1 Original article

2 **Pharmacokinetics-based identification of antiviral**  
3 **compounds of *Rheum palmatum* rhizomes and roots**  
4 **(Dahuang)**

5 Nan-Nan Tian<sup>a,b,1</sup>, Ling-Ling Ren<sup>b,c,1</sup>, Ya-Xuan Zhu<sup>a,b,1</sup>, Jing-Ya Sun<sup>d,1</sup>,  
6 Jun-Lan Lu<sup>a,b</sup>, Jia-Kai Zeng<sup>b</sup>, Feng-Qing Wang<sup>b</sup>, Fei-Fei Du<sup>b</sup>, Xi-He  
7 Yang<sup>b,c</sup>, Shu-Ning Ge<sup>d</sup>, Rui-Min Huang<sup>d,\*\*\*</sup>, Wei-Wei Jia<sup>b,\*\*</sup>, Chuan  
8 Li<sup>a,b,c,e,\*</sup>

9 <sup>a</sup>*Graduate School, Tianjin University of Traditional Chinese Medicine, Tianjin,*  
10 *300193, China*

11 <sup>b</sup>*State Key Laboratory of Drug Research, Shanghai Institute of Materia Medica,*  
12 *Chinese Academy of Sciences, Shanghai, 201203, China*

13 <sup>c</sup>*School of Pharmacy, University of Chinese Academy of Sciences, Beijing, 100049,*  
14 *China*

15 <sup>d</sup>*Center for Drug Safety Evaluation and Research, Shanghai Institute of Materia*  
16 *Medica, Chinese Academy of Sciences, Shanghai, 201203, China*

17 <sup>e</sup>*Haihe Laboratory of Modern Chinese Medicine, Tianjin 301617, China*

18

19

20

21

22 \* Corresponding author.

23 State Key Laboratory of Drug Research, Shanghai Institute of Materia Medica,  
24 Chinese Academy of Sciences, Shanghai, 201203, China.

25 \*\* Corresponding author.

26 \*\*\* Corresponding author.

27 *E-mail addresses:* [rmhuang@simm.ac.cn](mailto:rmhuang@simm.ac.cn) (R-M. Huang), [weiweijia@simm.ac.cn](mailto:weiweijia@simm.ac.cn)

28 ([W-W. Jia](mailto:W-W. Jia)), [chli@simm.ac.cn](mailto:chli@simm.ac.cn) (C. Li).

29 <sup>1</sup> These authors contributed equally to this work.

NOTE: This preprint reports new research that has not been certified by peer review and should not be used to guide clinical practice.

30 **Abstract**

31 The potential of Dahuang to eliminate lung pathogens was often highlighted in  
32 *Wenyi Lun*. This investigation aimed to identify potential antiviral compounds of  
33 herbal component Dahuang (*Rheum palmatum* rhizomes and roots) of  
34 LianhuaQingwen capsule, with respect to their systemic exposure and lung  
35 reachability. Circulating Dahuang compounds were identified in human volunteers  
36 receiving LianhuaQingwen. The reachability of these compounds to SARS-CoV-2  
37 3CL<sup>pro</sup> was assessed by *in vitro* transport, metabolism, immunohistochemistry, and  
38 3CL<sup>pro</sup>-biochemical studies. LianhuaQingwen contained 55 Dahuang constituents  
39 (0.01–2.08 μmol/day), categorized into eight classes. Only three compounds rhein (**3**),  
40 methylisorhein (**10**; a new Dahuang anthraquinone), and 4-*O*-methylgallic acid  
41 (**M42M<sub>2</sub>**) exhibited significant systemic exposure in humans. Two intestinal  
42 absorption mechanisms for **3** and **10** were proposed: active intestinal uptake of **3/10**  
43 by human TAUT/ASBT and human MRP1/3/4, and intestinal lactate-phlorizin  
44 hrdolyase-mediated hydrolysis of rhein-8-*O*-β-D-glucoside (**9**), followed by the  
45 transporter-mediated absorption of released **3**. Targeted reachability of circulating  
46 **3/10** could be achieved as rat orthologues of human ASBT/TAUT was observed in  
47 alveolar and bronchial epithelia. These compounds exhibited potential ability to  
48 inhibit the 3CL<sup>pro</sup> enzyme responsible for coronaviral replication. Notably, Dahuang  
49 anthraquinones and tannins varied greatly in pharmacokinetics between humans and  
50 rats after dosing LianhuaQingwen. This investigation, along with such investigations  
51 of other components, has implications for precisely defining the therapeutic benefits  
52 of Dahuang-containing medicines.

53

54

55 **Abbreviations:** 3CL<sup>pro</sup>, 3-chymotrypsin-like protease; ASBT/Asbt, apical  
56 sodium-dependent bile acid transporter; TAUT/Taut, taurine transporter.

57

58

59

60 **Keywords:** Rhein; methylisorhein; *Rheum palmatum*; Dahuang; Rhubarb;  
61 LianhuaQingwen; 3CL<sup>pro</sup>; COVID-19

## 62 1. Introduction

63 Dahuang (Rhubarb) has been used in traditional Chinese medicine for over 2000  
64 years. Its medicinal properties and various applications were first recorded in the  
65 *Divine Husbandman's Classic of Materia Medica (Shen Nong Ben Cao Jing)* during  
66 the Han Dynasty. The medicinal herb is obtained from the dried roots and rhizomes of  
67 three species: *Rheum palmatum* L., *Rheum tanguticum* Maxim. ex Balf., and *Rheum*  
68 *officinale* Baill, which are included in the 2020 Chinese Pharmacopeia [1, 2].  
69 According to the *Epidemic Febrile Disease (Wenyi Lun)* in the Ming Dynasty,  
70 Dahuang was used to eliminate pestilential qi due to its penetrating properties without  
71 detainment [3]. This theory proposed that "epidemic disease" was caused by the  
72 infection of pestilential qi, which referred to an exogenous disease pathogen that was  
73 highly contagious and had an unpredictable epidemic pattern. Modern research  
74 provided evidence suggesting that Dahuang extracts possessed inhibitory activity  
75 against the 3-chymotrypsin-like protease (3CL<sup>pro</sup>) of severe acute respiratory  
76 syndrome coronavirus (SARS-CoV) [4]. Furthermore, an integrated computational  
77 study revealed that 13 natural anthraquinones, including chrysophanol, emodin,  
78 aloe-emodin, rhein, and alterporriol Q, exhibited promising potential as inhibitors of  
79 3CL<sup>pro</sup> of SARS-CoV-2 [5]. The application and findings indicated that Dahuang  
80 compounds might possess promising antiviral properties in humans. Additionally, the  
81 rapid development of modern science unraveled numerous pharmacological activities  
82 associated with Dahuang, including its purgative effects, anti-inflammatory properties,  
83 hepatoprotective benefits, and positive impacts on the gallbladder. Dahuang was used  
84 in clinical settings to treat constipation, severe acute pancreatitis, sepsis, and chronic  
85 liver and kidney diseases due to its extensive pharmacological effects [1, 6-8].

86 Dahuang has mainly been used for medicinal purposes in Asia, but it often refers to a  
87 few edible Dahuang in Europe and the Middle East [6, 7]. Concerns regarding the  
88 safety of Dahuang have arisen due to reports suggesting potential liver and kidney  
89 toxicity associated with long-term high-dose administration of Dahuang in rats,  
90 prompting global scrutiny on its safety profile [1, 6, 9].

91 LianhuaQingwen capsule, a traditional Chinese medicine that contains Dahuang,  
92 has been widely used in China for the treatment of acute respiratory viral infections  
93 caused by various viruses, including SARS-CoV, MERS-CoV, influenza A virus  
94 (including H1N1 and H7N9), and more recently, SARS-CoV-2 [10, 11]. Several  
95 clinical investigations reported the potential of the capsule as a valuable treatment  
96 option for both COVID-19 and influenza patients. Its ability to improve viral  
97 clearance, alleviate symptoms, and reduce inflammatory markers makes it a  
98 promising addition to conventional care [12-16]. In a recent prospective, multicenter,  
99 randomized controlled trial of 284 patients with COVID-19, adding LianhuaQingwen  
100 to conventional care further improved the recovery rate of symptoms, shortened the  
101 time to symptom recovery, and improved the recovery of chest radiologic  
102 abnormalities ( $P < 0.05$  for all) [12]. Treatment of the capsule in influenza patients  
103 was found to reduce the levels of serum inflammatory factors C-reactive protein, IL-6,  
104 and procalcitonin [16]. In a cell-based study, LianhuaQingwen demonstrated  
105 inhibition of SARS-CoV-2 replication and induced abnormal particle morphology of  
106 the virion [17]. Additionally, several circulating constituents of LianhuaQingwen,  
107 including rhein, forsythoside A, forsythoside I, and neochlorogenic acid, were  
108 identified as inhibitors of the host target cell-surface protein known as angiotensin  
109 converting enzyme 2 receptor [18], to which the SARS-CoV-2 spike protein binds.

110 LianhuaQingwen capsule is derived from 13 herbal components and possesses

111 complex chemical composition. For systemic treatment of acute respiratory viral  
112 infection with LianhuaQingwen, identification of circulating compounds in  
113 unchanged and/or metabolized forms is vital for facilitating their access to the loci  
114 responsible for therapeutic effects. To this end, comprehensive understanding of  
115 chemical composition of LianhuaQingwen and better evaluation of pharmacokinetics,  
116 disposition, and targeted reachability of its bioavailable compounds are vital for  
117 translating the potential benefits of the capsule into therapeutic application.  
118 Successful identification of such constituents necessitates a comprehensive approach  
119 to the multi-compound pharmacokinetic investigation of herbal medicine such that the  
120 potentially important herbal compounds are singled out with their accurate  
121 pharmacokinetic and disposition data and that no such compound is missed (in a few  
122 words, ‘precision without omission’) [19-30]. In our ongoing series of  
123 multi-compound pharmacokinetic investigations on LianhuaQingwen, we have  
124 previously conducted research on the constituents originating from the herbal  
125 component Gancao in humans after dosing the capsule [20]. In this current  
126 investigation, our focus is on the component Dahuang, with the aim of identifying the  
127 compounds that are likely to have therapeutic significance. Dahuang is extensively  
128 used as an herb in Chinese herbal medicines as well as dietary products. Therefore,  
129 further research is necessary to elucidate the specific compounds responsible for its  
130 pharmacological effects. This research has important implications for the safe  
131 utilization of Dahuang-containing herbal medicines. Specifically, this  
132 pharmacokinetic investigation aimed to identify bioavailable Dahuang compounds  
133 that have systemic exposure and targeted reachability, and are likely to influence the  
134 therapeutic outcomes of Dahuang-containing herbal medicines, such as  
135 LianhuaQingwen.

## 136 **2. Materials and methods**

137 A detailed description of materials and experimental procedures is provided in the  
138 [Supplementary Materials and methods](#).

### 139 *2.1. Study materials*

140 LianhuaQingwen capsules are produced by Shijiazhuang Yiling Pharmaceutical  
141 Co., Ltd and have a Chinese NMPA drug ratification number of  
142 GuoYaoZhunZi-Z20040063. Samples of LianhuaQingwen capsules were obtained  
143 from the manufacturer, along with individual samples of the herbal components, and  
144 stored at -20°C until analysis to assess their chemical composition and lot-to-lot  
145 variability. Purified compounds found in *Rheum* species were obtained commercially  
146 ([Table S1](#)). One such compound, 3,8-dihydroxy-1-methylanthraquinone-2-carboxylic  
147 acid (methylisorhein), was extracted and isolated from Dahuang (*R. palmatum*  
148 rhizomes and roots) ([Table S2](#)).

149 Caco-2 cells and HEK-293 cells were obtained from American Type Culture  
150 Collection (Manassas, VA, USA). Various human transporter cDNAs and human  
151 enzyme cDNA lactase-phlorizin hydrolase (LPH) were constructed commercially.  
152 Inside-out membrane vesicles expressing human ATP-binding cassette transporter  
153 were purchased from GenoMembrane (Kanazawa, Japan). Pooled human liver  
154 microsomes (HLM) and pooled human liver cytosol (HLC) were obtained from  
155 Corning Gentest (Woburn, MA, USA). Commercially available positive substrates for  
156 these transporters and enzymes were also obtained.

### 157 *2.2. Human pharmacokinetic study*

158 A pharmacokinetic study on LianhuaQingwen capsule was conducted at Hebei  
159 Yiling Hospital (Shijiazhuang, Hebei Province, China). The study was approved by  
160 the hospital's ethics committee and registered with the Chinese Clinical Trials  
161 Registry (ChiCTR1900021460), following the Declaration of Helsinki. Fourteen  
162 healthy volunteers participated in the study after providing written informed consent.  
163 The study details have been previously described [20]. Briefly, the participants  
164 received a single dose of 12 capsules of LianhuaQingwen on day 1 and days 3-8.  
165 Blood samples were collected before and at various time points after dosing on day 1,  
166 and urine samples were collected within specific time periods. On days 3-7, blood  
167 samples were collected before and 12 hours after dosing. On day 8, both blood and  
168 urine samples were collected according to the respective time schedules on day 1. The  
169 samples were treated and stored for analysis by liquid chromatography/mass  
170 spectrometry at  $-70^{\circ}\text{C}$ .

### 171 *2.3. Supportive in vitro transport and metabolism studies*

#### 172 *2.3.1. Transport study using Caco-2 cell monolayers*

173 The membrane permeability of Dahuang compounds, including chrysophanol (**1**;  
174  $5\ \mu\text{mol/L}$ ), emodin-8-*O*- $\beta$ -D-glucoside (**2**;  $50\ \mu\text{mol/L}$ ), rhein (**3**;  $5\ \mu\text{mol/L}$ ),  
175 chrysophanol-8-*O*- $\beta$ -D-glucoside (**4**;  $50\ \mu\text{mol/L}$ ), emodin (**5**;  $5\ \mu\text{mol/L}$ ),  
176 physcion-8-*O*- $\beta$ -D-glucoside (**6**;  $50\ \mu\text{mol/L}$ ), chrysophanol-1-*O*- $\beta$ -D-glucoside (**7**;  $50$   
177  $\mu\text{mol/L}$ ), physcion (**8**;  $5\ \mu\text{mol/L}$ ), rhein-8-*O*- $\beta$ -D-glucoside (**9**;  $50\ \mu\text{mol/L}$ ),  
178 methylisorhein (**10**;  $5\ \mu\text{mol/L}$ ), and aloe-emodin (**11**;  $5\ \mu\text{mol/L}$ ), was assessed using  
179 Caco-2 cell monolayers. The cells were cultured and the integrity of the cell  
180 monolayers was measured. The apparent permeability coefficient ( $P_{\text{app}}$ ) of each test

181 compound was calculated ([Supplementary Materials and methods](#)). The test  
182 compounds were classified into three categories based on their  $P_{app}$  values: low,  
183 intermediate, or high membrane permeability [21]. The efflux ratio (EfR) was  
184 calculated and used to determine the possible involvement of a transporter-mediated  
185 efflux mechanism. Verapamil, MK571, and novobiocin were added to inhibit ABC  
186 transporters multidrug resistance protein 1 (MDR1), multidrug resistance-associated  
187 protein 2 (MRP2), and breast cancer resistance protein (BCRP). Atenolol and  
188 antipyrine were used as low and high permeability reference compounds, respectively,  
189 while rhodamine 123, sulfasalazine, and estrone-3-sulfate were used as probe  
190 substrates of MDR1, MRP2, and BCRP, respectively. The experimental details have  
191 been previously described [31].

### 192 2.3.2. Transport studies using cells transfected with SLC transporters or membrane 193 vesicles expressing ABC transporters

194 Cellular uptake of chrysophanol (**1**; 5  $\mu\text{mol/L}$ ), emodin-8-*O*- $\beta$ -D-glucoside (**2**; 50  
195  $\mu\text{mol/L}$ ), rhein (**3**; 5  $\mu\text{mol/L}$ ), chrysophanol-8-*O*- $\beta$ -D-glucoside (**4**; 50  $\mu\text{mol/L}$ ),  
196 emodin (**5**; 5  $\mu\text{mol/L}$ ), physcion-8-*O*- $\beta$ -D-glucoside (**6**; 50  $\mu\text{mol/L}$ ),  
197 chrysophanol-1-*O*- $\beta$ -D-glucoside (**7**; 50  $\mu\text{mol/L}$ ), physcion (**8**; 5  $\mu\text{mol/L}$ ),  
198 rhein-8-*O*- $\beta$ -D-glucoside (**9**; 50  $\mu\text{mol/L}$ ), methylisorhein (**10**; 5  $\mu\text{mol/L}$ ), aloe-emodin  
199 (**11**; 5  $\mu\text{mol/L}$ ), gallic acid (**42**; 5  $\mu\text{mol/L}$ ), and 4-*O*-methylgallic acid (**M42<sub>M2</sub>**; 5  
200  $\mu\text{mol/L}$ ) was assessed using human apical sodium-dependent bile acid transporter  
201 (ASBT)-, taurine transporter (TAUT)-, organic anion-transporting polypeptide 2B1  
202 (OATP2B1)-, organic anion transporter 1 (OAT1)-, OAT2-, OAT3-, OAT4-, organic



203 cation transporter 2 (OCT2)-, peptide transporter 1 (PEPT1)-, and PEPT2-transfected  
204 HEK-293 cells. In addition, vesicular transport of **3** (5  $\mu\text{mol/L}$ ) and **10** (5  $\mu\text{mol/L}$ )  
205 was assessed using vesicles expressing human MDR1, BCRP, MRP1, MRP2, MRP3,  
206 or MRP4. All the incubation samples were analyzed by liquid chromatography/mass  
207 spectrometry. The experimental details have been previously described [32, 33].

### 208 2.3.3. Metabolism studies

209 The deglycosylation of emodin-8-*O*- $\beta$ -D-glucoside (**2**),  
210 chrysophanol-8-*O*- $\beta$ -D-glucoside (**4**), physcion-8-*O*- $\beta$ -D-glucoside (**6**),  
211 chrysophanol-1-*O*- $\beta$ -D-glucoside (**7**), or rhein-8-*O*- $\beta$ -D-glucoside (**9**), each at 1  
212  $\mu\text{mol/L}$ , was assessed using recombinant human LPH. Glucuronidation, sulfation, and  
213 oxidation of rhein (**3**) or methylisorhein (**10**), each at 1  $\mu\text{mol/L}$ , were assessed using  
214 UDPGA-fortified HLM, PAPS-fortified HLC, and NADPH-fortified HLM. The  
215 detailed incubation conditions were described previously [30].

### 216 2.4. Supportive rat pharmacokinetic studies

217 Rat pharmacokinetic study on LianhuaQingwen capsule was conducted at  
218 Laboratory Animal Center of Shanghai Institute of Materia Medica (Shanghai, China).  
219 Three studies were approved by the Institutional Animal Care and Use Committee,  
220 following the Guidelines for Ethical Treatment of Laboratory Animals by the Ministry  
221 of Science and Technology of China. Femoral artery cannulation or bile duct  
222 cannulation was performed to collect rat blood or bile, respectively [23]. In these  
223 three rat studies, all the rats were given an oral dose of LianhuaQingwen at 3.78 g/kg.

224 The first study involved the collection of serial blood samples before and at various  
225 time points after dosing. The blood samples were treated and centrifuged to produce  
226 plasma samples. The second study involved the collection of serial urine samples  
227 within specific time periods after dosing. The third study involved the collection of  
228 serial bile samples within specific time periods after dosing. The samples were stored  
229 for analysis by liquid chromatography/mass spectrometry at  $-70^{\circ}\text{C}$ .

### 230 *2.5. Assay for composition analysis of Dahuang constituents in LianhuaQingwen*

231 The composition analysis of LianhuaQingwen for constituents originating from  
232 the component Dahuang was conducted using liquid chromatography/mass  
233 spectrometry. A literature-derived list of candidate compounds was used to guide the  
234 analysis, and a comprehensive detection approach was employed to identify all  
235 constituents present in the sample. The detected constituents underwent  
236 characterization and quantification for ranking and grading. Fourteen capsule lots  
237 were analyzed to assess inter-lot variability.

### 238 *2.6. Bioanalytical assays for analyses of Dahuang compounds and other study* 239 *compounds*

240 The pharmacokinetics of Dahuang compounds in LianhuaQingwen  
241 administration was investigated through two types of bioanalyses. The first type  
242 involved profiling unchanged and metabolized Dahuang compounds in human/rat  
243 samples. This was accomplished utilizing the Acquity ultra performance liquid  
244 chromatographic separation module/Waters Synapt G2 mass spectrometer to detect,

245 characterize, and quantify the compounds. The second type involved quantifying  
246 specific Dahuang compounds in human/rat samples and *in vitro* samples using an  
247 Applied Biosystems Sciex Triple Quad 5500 mass spectrometer interfaced with an  
248 Agilent 1290 Infinity II LC system. The concentrations of various reference  
249 compounds in *in vitro* study samples were analyzed using liquid  
250 chromatography/mass spectrometry. Assay validation, implemented according to the  
251 European Medicines Agency Guideline on bioanalytical method validation (2012),  
252 demonstrated that the quantification assays developed were reliable and reproducible  
253 for the intended use, despite no internal standard being used.

#### 254 *2.7. In vitro assessment of SARS-CoV-2 3CL<sup>pro</sup> protease inhibition*

255 The proteolytic activity of the 3-chymotrypsin-like protease (3CL<sup>pro</sup>) of  
256 SARS-CoV-2 was assessed with a fluorescence resonance energy transfer (FRET)  
257 assay. The activity of recombinant SARS-CoV-2 3CL<sup>pro</sup> was evaluated in cleaving a  
258 synthetic fluorogenic peptide substrate MCA-AVLQSGFR-Lys(Dnp)-Lys-NH<sub>2</sub>, which  
259 was derived from the N-terminal auto-cleavage sequence from the viral protease. The  
260 cleaved MCA peptide fluorescence was measured by a SpectraMax M2 microplate  
261 reader (Molecular Devices; CA, USA) at an excitation wavelength of 325 nm and an  
262 emission wavelength of 393 nm. The assay reaction buffer contained 50 mM Tris-HCl  
263 (pH 7.3), 1 mM EDTA, and 20 μM peptide substrate. Enzymatic reactions were  
264 initiated with the addition of 100 nM SARS-CoV-2 3CL<sup>pro</sup> and allowed to proceed at  
265 37 °C for 10 min (under linear cleavage condition). The Michaelis-Menten constant of  
266 the peptide substrate for SARS-CoV-2 3CL<sup>pro</sup> was measured to determine the  
267 substrate concentration used in the following inhibition assessment. Ebselen, a

268 positive inhibitor of SARS-CoV-2 3CL<sup>pro</sup>, decreased the fluorescence. The inhibition  
269 potencies of the test Dahuang compounds, such as rhein (**3**), methylisorhein (**10**),  
270 aloe-emodin (**11**), 4-*O*-methylgallic acid (**M42<sub>M2</sub>**), and gallic acid (**42**), were initially  
271 screened at a concentration of 100 μmol/L. The Dahuang compounds that showed ≥  
272 50% inhibition in the initial screening were further evaluated at multiple  
273 concentrations for their half-maximal inhibitory concentrations (IC<sub>50</sub>) for  
274 SARS-CoV-2 3CL<sup>pro</sup>. For the IC<sub>50</sub> assessment, the recombinant protease was  
275 incubated with the peptide substrate at 1.4 μmol/L (the *K<sub>m</sub>* for SARS-CoV-2 3CL<sup>pro</sup>)  
276 in the presence or absence of the test Dahuang compound.

## 277 2.8. Western blot

278 HEK-293 cells were transfected with empty vector, human Flag-ASTB, human  
279 Flag-TAUT, rat Flag-ASBT, or rat Flag-TAUT plasmids for 48 hours. After that, the  
280 cells were harvested and lysed with RIPA lysis buffer (pH 7.5) containing 150 mM  
281 NaCl, 1 mM Na<sub>3</sub>VO<sub>4</sub>, 50 mM Tris-HCl, 25 mM NaF, 1% NP-40, 0.5% sodium  
282 deoxycholate, 0.1% SDS, and 1% phosphatase inhibitor cocktails. Rat lung, bronchus,  
283 liver, and intestine were collected and lysed in the same RIPA lysis buffer using a  
284 grinder. Subsequently, 20 μg of the aforementioned proteins were loaded onto  
285 SDS-PAGE and transferred to nitrocellulose membranes (Millipore, Billerica, MA,  
286 USA). The membranes were then incubated overnight at 4°C with primary antibodies  
287 against ASBT (1:1000, 25245-1-AP; Proteintech, Wuhan, Hubei Province, China) or  
288 TAUT (1:1000, PA5-98161; Invitrogen, Waltham, MA, USA). For detection, the  
289 membranes were treated with secondary antibodies conjugated to horseradish

290 peroxidase (Jackson, West Grove, PA, USA) and the immunoreactive proteins were  
291 visualized using the West Pico PLUS Chemiluminescent Substrate (Thermo, Waltham,  
292 MA, USA) and imaged using chemiluminescent imaging.

### 293 *2.9. Immunohistochemistry*

294 Rat lung and intestine tissues were fixed in 4% paraformaldehyde and embedded  
295 in paraffin. The tissues were then sectioned into 5  $\mu\text{m}$  thick paraffin sections and  
296 deparaffinized. Antigen retrieval was performed using Tris-EDTA (pH 9.0). For  
297 immunohistochemistry staining, the sections were incubated with primary antibodies  
298 against ASBT (1:100, AB203205; Abcam, Cambridge, UK) or TAUT (1:500,  
299 PA5-98161; Invitrogen, Waltham, MA, USA), followed by incubation with  
300 biotinylated goat anti-rabbit IgG as secondary antibodies. Signals were amplified  
301 using a DAB kit (Maixin Bio, Fuzhou, Fujian Province, China) and counterstained  
302 with hematoxylin.

### 303 *2.10. Data Processing*

304 After conducting the composition analysis, the detected and characterized  
305 Dahuang constituents were ranked and graded into different levels based on their  
306 daily doses. The daily compound dose was calculated by multiplying the compound  
307 level in LianhuaQingwen and the capsule's label daily dose of 4.2 g/day.  
308 Noncompartmental analysis was used to estimate pharmacokinetic parameters of  
309 Dahuang compounds. Renal clearance ratio ( $R_{rc}$ ) was calculated using renal clearance,  
310 glomerular filtration rate [34], and unbound fraction in human plasma. Data are  
311 expressed as mean  $\pm$  standard deviation, and statistical analysis was performed using

312 a two-tailed unpaired Student t-test. A value of  $P < 0.05$  was considered statistically  
313 significant.

### 314 **3. Results**

#### 315 *3.1. Constituents originating from Dahuang and their abundance in LianhuaQingwen*

316 Based on the composition analysis conducted, a total of 55 constituents that  
317 originated from the Dahuang component were detected and characterized in samples  
318 of LianhuaQingwen (Fig. 1 and Table S3). These constituents were divided into eight  
319 classes, including anthraquinones (1–22), anthrones (31–34), tannins (41–52),  
320 flavonoids (61–64), naphthalenes (71–73), stilbenes (81–84), pyranones (91–94), and  
321 phenylbutanones (101 and 102). All of these constituents had a compound dose of  $\geq$   
322 0.01  $\mu\text{mol/day}$ . Notably, these constituents were not detected in any other components  
323 of LianhuaQingwen, except for gallic acid (42) which was also detected in the  
324 component Hongjingtian (*R. crenulata* rhizomes and roots). The major constituents of  
325 Dahuang were identified as chrysophanol (1), emodin-8-*O*- $\beta$ -D-glucoside (2), rhein  
326 (3), chrysophanol-8-*O*- $\beta$ -D-glucoside (4), emodin (5), and  
327 physcion-8-*O*- $\beta$ -D-glucoside (6). These major constituents had a compound dose of  
328 1.0–2.2  $\mu\text{mol/day}$ . Moreover, LianhuaQingwen also exhibited lot-to-lot variations of  
329 8.3%–12.1% for the major anthraquinones (1–6) and 6.6%–55.3% for the rest of the  
330 minor constituents.

331 **(Insert Figure 1 here)**

332 *3.2. Major circulating Dahuang compounds after dosing LianhuaQingwen and their*  
333 *plasma pharmacokinetics: interspecies differences between humans and rats*

334 Only two classes of compounds, i.e., anthraquinones and tannins, had significant  
335 systemic exposure in humans following administration of LianhuaQingwen (Fig. 2  
336 and Table 1), despite the presence of 55 Dahuang constituents of eight classes in the  
337 capsule. Human systemic exposure to anthraquinones varied greatly, with unchanged  
338 rhein (**3**) and methylisorhein (**10**), rather than their metabolites, being the most  
339 abundant in circulation. The other anthraquinones, including chrysophanol (**1**),  
340 emodin-8-*O*- $\beta$ -D-glucoside (**2**), chrysophanol-8-*O*- $\beta$ -D-glucoside (**4**), emodin (**5**),  
341 physcion-8-*O*- $\beta$ -D-glucoside (**6**), chrysophanol-1-*O*- $\beta$ -D-glucoside (**7**), physcion (**8**),  
342 rhein-8-*O*- $\beta$ -D-glucoside (**9**), and aloe-emodin (**11**), were either not detectable or  
343 present in negligible levels in human plasma, either as unchanged compounds or  
344 metabolites. The major circulating compound of tannins was 4-*O*-methylgallic acid  
345 (**M42<sub>M2</sub>**), which was a methylated metabolite of gallic acid (**42**), while **42** and its  
346 other methylated metabolite 3-*O*-methylgallic acid (**M42<sub>M1</sub>**) were detected at low  
347 levels in plasma (Fig. 2). All circulating compounds were also detected in human  
348 urine.

349 **(Insert Figure 2 and Table 1 here)**

350 The data presented in Fig. 2 highlights significant differences in the exposure  
351 profile of Dahuang anthraquinones between rats and humans when they received  
352 LianhuaQingwen. Although rhein (**3**) and methylisorhein (**10**) were the major  
353 circulating anthraquinones for both rats and humans, rats had additional circulating  
354 anthraquinones and their metabolites that either went undetected or were present in  
355 limited quantities in human plasma. These newly detected anthraquinones in rats



356 included chrysophanol (**1**), chrysophanol-1-*O*-glucuronide (**M1<sub>G1</sub>**),  
357 chrysophanol-8-*O*-glucuronide (**M1<sub>G2</sub>**), rhein-*O*-glucuronide (**M3<sub>G1</sub>**),  
358 emodin-3-*O*-glucuronide (**M5<sub>G3</sub>**), physcion-1-*O*-glucuronide (**M8<sub>G1</sub>**), and  
359 physcion-8-*O*-glucuronide (**M8<sub>G2</sub>**). The major circulating compound in humans for  
360 tannins was 4-*O*-methylgallic acid (**M42<sub>M2</sub>**), while both **M42<sub>M2</sub>** and gallic acid (**42**)  
361 were the major circulating compounds in rats. These findings suggest that the  
362 systemic exposure to anthraquinones and tannins could differ considerably between  
363 rats and humans, and that such differences should be taken into account when  
364 evaluating the safety and efficacy of the Dahuang-containing herbal medicine in  
365 preclinical studies.

366 [Table 2](#) summarizes the plasma pharmacokinetics of major circulating Dahuang  
367 compounds [rhein (**3**), methylisorhein (**10**), and 4-*O*-methylgallic acid (**M42<sub>M2</sub>**)] in  
368 humans who were given 12 capsules/day of LianhuaQingwen. As illustrated in [Fig. 3](#),  
369 both **3** and **10** showed unimodal plasma concentration-time profiles, reaching their  
370 peak concentrations ( $T_{peak}$ ) between 1 and 3 h. Females had a higher  $C_{max}$  and  
371  $AUC_{0-24h}$  for both **3** and **10** compared to males ( $P < 0.05$ ), with all the data adjusted  
372 for body weight. There was no significant accumulation of **3** and **10** after  
373 administering LianhuaQingwen for seven consecutive days ( $P > 0.05$ ). As shown in  
374 [Table 2](#), renal clearance ratio ( $R_{rc}$ ) of **3** and **10** suggested that the renal excretion  
375 involved tubular secretion, which was mediated by the renal basolateral SLC uptake  
376 transporters OAT1, OAT2, and OAT3 ([Tables 3](#) and [S4](#)). In addition, **10**, but not **3**,  
377 was also a substrate of the renal apical SLC uptake transporter OAT4, which could

378 induce tubular reabsorption of **10**. The plasma concentration-time profiles of **M42<sub>M2</sub>**  
379 were similar to those of **3** and **10**, as demonstrated in [Table 2](#) and [Fig. 3](#). The  $R_{tc}$  of  
380 **M42<sub>M2</sub>** in [Table 2](#) showed that its renal excretion involved tubular secretion, which  
381 was also mediated by OAT1, OAT2, and OAT3 ([Table 3](#)).

382 **(Insert Figure 3 and Tables 2 and 3 here)**

383 *3.3 Factors governing the differential human systemic exposure to Dahuang*  
384 *anthraquinones: transporter-mediated intestinal absorption and LPH-mediated*  
385 *pre-absorption metabolism*

386 Membrane permeability was assessed using Caco-2 cell monolayer to understand  
387 the factors governing differential human systemic exposure to the anthraquinones.  
388 Rhein (**3**) and methylisorhein (**10**) showed moderate membrane permeability ([Table 4](#)).  
389 Estimated water solubility of these two compounds ([Table S5](#)), in relation to their  
390 respective compound doses from LianhuaQingwen and Caco-2-based permeability,  
391 was insufficient to achieve adequate intestinal absorption [[35](#), [36](#)]. Intestinal  
392 penetration of **3** and **10** could also be limited by human intestinal apical MDR1-,  
393 BCRP-, and MRP2-mediated efflux into the intestinal lumen ([Table 4](#) and [Table S6](#)).  
394 However, human intestinal apical ASBT and TAUT could enhance intestinal  
395 absorption of these compounds into intestinal epithelia ([Table 3](#)), and human intestinal  
396 basolateral MRP1, MRP3, and MRP4 could mediate the compounds' efflux into blood  
397 ([Table S6](#)). Rhein-8-*O*- $\beta$ -D-glucoside (**9**), which had poor membrane permeability for  
398 intestinal absorption, was not a substrate of ASBT or TAUT. However, this

399 anthraquinone glucoside was found to be a substrate of human intestinal LPH, which  
400 could facilitate the pre-absorption deglycosylation of **9** into the absorbable **3**. *In vitro*  
401 metabolism studies suggested that **3** and **10** were resistant to human hepatic  
402 glucuronidation, sulfation, or oxidation (Fig. S1).

403 **(Insert Figure 4 and Table 4 here)**

404 In terms of the other anthraquinone constituents with a compound dose of > 0.3  
405  $\mu\text{mol/day}$ , emodin-8-*O*-glucoside (**2**) and physcion (**8**) were found to have poor  
406 membrane permeability, which limited their passive intestinal absorption. Although  
407 chrysophanol (**1**), chrysophanol-8-*O*-glucoside (**4**), emodin (**5**),  
408 physcion-8-*O*-glucoside (**6**), chrysophanol-1-*O*-glucoside (**7**), and aloe-emodin (**11**)  
409 showed high or intermediate permeability, **1**, **5**, **6**, and **11** exhibited poor water  
410 solubility, which could limit their passive intestinal absorption (Table S5).  
411 Additionally, their pre-absorption deglycosylation by human intestinal LPH  
412 transforming **4** and **7** into unabsorbable **1** and the efflux action of intestinal apical  
413 transporters on them restricted their passive intestinal penetration (Table 4). None of  
414 these compounds was a substrate of ASBT or TAUT (Table 3).

415 *3.4. Inhibitory activities, against SARS-CoV-2 3CL<sup>pro</sup>, of circulating Dahuang*  
416 *compounds and other circulating compounds of LianhuaQingwen*

417 Rhein (**3**) and methylisorhein (**10**) inhibited 3CL<sup>pro</sup> of SARS-CoV-2 with IC<sub>50</sub>  
418 values of 4.6 and 37.2  $\mu\text{mol/L}$ , respectively (Fig. 5). However, despite being tested at  
419 100  $\mu\text{mol/L}$ , other Dahuang compounds, such as 4-*O*-methylgallic acid (**M42M2**),

420 gallic acid (**42**), and aloe-emodin (**11**), showed less than 50% inhibition of the viral  
421 protease. Furthermore, following our prior and ongoing pharmacokinetic  
422 investigations on LianhuaQingwen, we singled out several LianhuaQingwen  
423 compounds originating from the capsule's other components and subjected them to  
424 SARS-CoV-2 3CL<sup>PRO</sup> inhibition tests. These compounds, unchanged or metabolized,  
425 were glycyrrhetic acid, 24-hydroxyglycyrrhetic acid, ephedrine, pseudoephedrine,  
426 hydroxytyrosol-3-*O*-sulfate, hydroxytyrosol, phillygenin, phillygenin-*O*-sulfate,  
427 pinoselinol, and menthol-1-*O*-glucuronide and showed less than 50% inhibition of the  
428 viral protease, despite being tested at 100 µmol/L.

429 **(Insert Figure 5 here)**

### 430 *3.5. Expression and cellular localization of Taut and Asbt in rat intestine and lung*

431 The specificity of the anti-TAUT and anti-ASBT antibodies was assessed using  
432 Western Blot analysis. HEK-293 cells expressing human TAUT, human ASBT, rat  
433 Taut, or rat Asbt with a Flag-tag were used for the experiment. The Flag-tag antibody  
434 successfully detected all four plasmids, confirming their expression in the cells. The  
435 anti-ASBT antibody recognized both human ASBT and rat Asbt, showing a band at  
436 40 kDa. Similarly, the anti-TAUT antibody detected a band at 65 kDa for both human  
437 TAUT and rat Taut ([Fig. 6A](#)). These findings validate the reliability of the anti-ASBT  
438 and anti-TAUT antibodies in detecting human ASBT/Asbt and TAUT/Taut proteins,  
439 respectively. Furthermore, the protein expression levels of Asbt and Taut were  
440 examined in rat intestine, liver, and lung tissues using Western Blot analysis with

441 anti-ASBT and anti-TAUT antibodies. Both proteins were detected in the bronchus,  
442 lung, liver, and intestine tissues of rats (Fig. 6B). Rat Asbt showed high expression in  
443 the bronchus, while Taut exhibited high expression in the liver. Additionally,  
444 immunohistochemical analysis was performed on rat lung and intestine tissues. In the  
445 bronchial epithelia, rat Asbt was primarily localized on the basolateral membrane,  
446 whereas rat Taut was extensively found in the alveolar epithelia and basolateral  
447 membrane of bronchial epithelia. Both Asbt and Taut were found in the apical  
448 membrane of epithelia in the intestinal villi (Fig. 6C).

449 **(Insert Figure 6)**

#### 450 **4. Discussion**

451 For a complex Chinese herbal medicine, only a few key constituents with  
452 drug-like properties are bioavailable at loci responsible for the medicine's therapeutic  
453 action, as opposed to all constituents [21]. Multi-compound pharmacokinetic  
454 investigation is a useful approach to accurately identify such potential herbal  
455 compounds without any omissions, relying on thorough comprehension of the  
456 medicine's chemical composition [37]. Such bioavailability of LianhuaQingwen  
457 compounds was investigated to evaluate the medicine's efficacy and safety in treating  
458 acute viral respiratory illnesses with respect to their systemic exposure and targeted  
459 reachability within the body [20]. As part of our multi-compound pharmacokinetic  
460 researches on LianhuaQingwen, the previous investigation found that the major  
461 circulating Gancao compounds, glycyrrhetic acid and 24-hydroxyglycyrrhetic acid (a  
462 new Gancao metabolite), could reach and inhibit renal distal tubular  
463  $11\beta$ -hydroxysteroid dehydrogenase type 2, a target responsible for Gancao-induced  
464 pseudoaldosteronism [20]. In the current investigation, a comprehensive analysis  
465 conducted and identified a total of 55 Dahuang constituents ( $\geq 0.01 \mu\text{mol/day}$ ) in  
466 LianhuaQingwen. However, among these constituents, only three exhibited  
467 significant systemic exposure in humans after dosing the capsule. These three  
468 constituents were the anthraquinones rhein (**3**) and methylisorhein (**10**; a new  
469 Dahuang anthraquinone), and the tannin 4-*O*-methylgallic acid (**M42<sub>M2</sub>**). Interestingly,  
470 the levels of the remaining anthraquinones and their metabolites, such as  
471 chrysophanol (**1**), emodin (**5**), physcion (**8**), and aloe-emodin (**11**), were either  
472 undetectable or found in very low quantities in human plasma. This significant  
473 variation in systemic exposure to Dahuang anthraquinones could be attributed to two

474 main factors: transporter-mediated intestinal absorption and LPH-mediated  
475 pre-absorption metabolism. Dahuang anthraquinones, including **3** and **10**, have poor  
476 water solubility, low membrane permeability, and/or intestinal apical efflux. These  
477 properties hindered their passive absorption in the intestine, meaning they could not  
478 easily cross the intestinal membrane on their own. However, in the case of **3** and **10**,  
479 the human intestinal apical uptake transporters ASBT and TAUT, as well as the  
480 human intestinal basolateral efflux transporters MRP1/3/4, could mediate their  
481 intestinal absorption and resulted in their significant systemic exposure in human after  
482 dosing the capsule. It should be noted that other Dahuang anthraquinones did not  
483 exhibit human ASBT- or TAUT-mediated absorption. Additionally, the enzyme LPH  
484 present in the human intestinal epithelia played a crucial role in facilitating the  
485 transformation of rhein-8-*O*- $\beta$ -D-glucoside (**9**) into readily absorbable **3**. Interestingly,  
486 this enzyme also transformed chrysophanol-8-*O*- $\beta$ -D-glucoside (**4**) and  
487 chrysophanol-1-*O*- $\beta$ -D-glucoside (**7**) into a non-absorbable **1**, despite their favorable  
488 characteristics of being highly water-soluble and easily permeable.

489 In addition to systemic exposure, targeted reachability of rhein (**3**) and  
490 methylisorhein (**10**) was also an important factor for the efficacy of LianhuaQingwen  
491 capsule, a medication used in China to treat viral respiratory illnesses, including  
492 severe acute respiratory syndrome (SARS), Middle East respiratory syndrome  
493 (MERS), and coronavirus disease 2019 (COVID-19). Infections of SARS-CoV,  
494 MERS-CoV, and SARS-CoV-2 could cause severe respiratory pathologies and lung  
495 injuries by infecting bronchial epithelial cells and pneumocytes in humans [38, 39].  
496 Therefore, it was crucial for the treatment to specifically target the lungs. The 3CL<sup>pro</sup>  
497 enzyme, due to its essential role in viral replication and high degree of conservation  
498 across all coronaviruses, as well as its absence in human homologs, has been

499 identified as an attractive target for the development of drug against coronaviruses  
500 such as SARS-CoV-2 [38, 40]. Rhein (**3**) and methylisorhein (**10**) demonstrated the  
501 ability to inhibit this enzyme, with IC<sub>50</sub> values of 4.6 and 37.2 μmol/L, respectively  
502 (Fig. 5). Like their human counterparts, TAUT and ASBT, mentioned above in the  
503 context of intestinal absorption of **3** and **10**, rat Taut and rat Asbt was also found to  
504 transport these two compounds (Fig. S2). The mRNA of human TAUT was found to  
505 be widely expressed in various human tissues, such as the lungs, kidneys, and liver,  
506 due to the recognized role of taurine, an endogenous substrate of TAUT, as an organic  
507 osmolyte [41, 42]. In contrast, ASBT mRNA was exclusively detected in the human  
508 ileum and kidney [43, 44]. Furthermore, the ASBT protein was found to be  
509 predominantly located on the apical membrane of enterocytes in the human terminal  
510 ileum [44, 45]. The intestinal TAUT and ASBT was considered a favorite target for  
511 developing "drug inhibitor" to regulate the levels of bile acids, cholesterol, lipids, and  
512 glucose, or "drug substrate" to improve its oral bioavailability [46, 47]. Although the  
513 precise localization of human TAUT and human ASBT proteins in lung epithelia  
514 remains unclear, their rat orthologues, Asbt and Taut, was observed in alveolar  
515 epithelia and the basolateral membrane of rat bronchial epithelia, as well as the apical  
516 membrane of epithelia in the intestinal villi in this investigation (Fig. 6). The uptake  
517 of circulating **3** and **10** into lung epithelia could be expected to exert their potential  
518 antiviral effects in humans. By targeting the lung epithelia and inhibiting the viral  
519 protease enzyme in humans, these two compounds had the potential to combat  
520 respiratory illnesses caused by coronaviruses such as SARS-CoV-2. Collectively,  
521 systemic exposure to and targeted reachability of **3** and **10** could be significant factors  
522 in the efficacy of LianhuaQingwen capsule. Further research on pulmonary  
523 localizations and genetic variations of TAUT and ASBT in humans will provide



524 additional insights into the mechanisms underlying the antiviral effects of **3** and **10**.

525 It is worth noting that systemic exposure to Dahuang anthraquinones and tannins  
526 may vary considerably between rats and humans after dosing LianhuaQingwen. While  
527 rhein (**3**) and methylisorhein (**10**) were the primary anthraquinones found in both rat  
528 and human plasma, rats exhibited additional circulating anthraquinones and their  
529 metabolites, including rhein-*O*-glucuronide (**M3<sub>G1</sub>**), that were either undetected or  
530 present in limited quantities in human plasma. In humans, the principal circulating  
531 compound for tannins was 4-*O*-methylgallic acid (**M42<sub>M2</sub>**), while both **M42<sub>M2</sub>** and  
532 gallic acid (**42**) were the major circulating compounds in rats. Glucuronidation was  
533 the main metabolic pathway of anthraquinones, including **3**, in rats after dosing a  
534 Dahuang extract, while methylation was the main metabolic pathway of gallic acid  
535 [48, 49]. Rhein was reported the only compound that humans were significantly  
536 exposed to after orally dosing a Dahuang extract [50]. To date, the pharmacokinetic  
537 mechanisms governing its significant systemic exposure, including its glucuronidation,  
538 remain unclear in humans. Our investigation revealed that, apart from rhein being  
539 absorbed in the intestines through human ASBT/TAUT-mediated intestinal uptake  
540 from the intestinal lumen and human MRP1/3/4-mediated intestinal efflux into the  
541 blood, poor metabolism of **3** in humans was found to be another factor contributing to  
542 its significant systemic exposure. This was evident from our observation that there  
543 was no significant difference in the systemic exposure to total **3** (including both free  
544 and conjugated forms) and free **3** in humans after oral administration of  
545 LianhuaQingwen (Fig. S3). This finding was further supported by the observed poor  
546 *in vitro* human hepatic glucuronidation, sulfation, and oxidation of **3** (Fig. S1).  
547 Methylisorhein (**10**) exhibited a similar situation in humans. The intestinal absorption  
548 of **3** and **10** in rats was also mediated by rat orthologues of human ASBT and human

549 TAUT. However, the molecular mechanisms by which other Dahuang anthraquinones  
550 and their metabolites were significantly exposed in rats remain unclear. Due to  
551 practical and ethical concerns associated with human experimentation, the use of  
552 animal models, specifically rats and mice, has become essential in antiviral research.  
553 These models are crucial for evaluating the safety and efficacy of antiviral drugs, in  
554 addition to conducting in vitro studies on their antiviral activities. Safety concerns  
555 arised due to the presence of the quinone moiety in the structure of these  
556 anthraquinones. Studies have focused on the potential hepatotoxicity of Dahuang,  
557 specifically investigating its anthraquinones and tannins[6]. However, these  
558 investigations have primarily relied on preclinical models, especially rat models [6,  
559 51]. Even when assessing the toxicity of specific compounds like **3**, the doses needed  
560 to induce toxicity were considerably higher than the typical doses used in clinical  
561 settings [51]. Therefore, such interspecies differences in systemic exposure to  
562 Dahuang anthraquinones should be taken into account when evaluating the safety and  
563 efficacy of the Dahuang-containing herbal medicine in preclinical studies. Further  
564 research is needed to fully understand the implications of the interspecies differences  
565 associated with molecular mechanisms, in order to accurately assess its potential  
566 benefits and risks in humans.

567 In the field of herbal medicine, anthraquinones are found in a diverse range of  
568 plant species, particularly in the families *Polygonaceae* (such as the Chinese  
569 medicinal herb Dahuang), *Fabaceae* (Juemingzi and Fanxieye), and *Rubiaceae*  
570 (Qiecao). Anthraquinones can be present in these herbs both in their free form as  
571 aglycones (like rhein) and bound to sugar residues (like rhein-8-*O*- $\beta$ -D-glucoside).  
572 The quantity of free and glycosylated anthraquinones in herbal medicines can be  
573 affected by factors like the specific origin, variety, and processing methods of the

574 component herb. These variations in the active constituents of the herb can affect  
575 quality and efficacy of the herbal medicines. For example, in the case of Dahuang,  
576 which includes the rhizomes and roots of *R. palmatum* L., *R. tanguticum* Maxim. ex  
577 Balf., and *R. officinale* Baill. from the *Polygonaceae* family, the ratio of free and  
578 glycosylated rhein content can vary greatly, ranging from 0.001 to 65 [52]. In herbal  
579 medicines rich in  $\beta$ -glycosylated anthraquinones, lactase or lactase-phlorizin  
580 hydrolase (LPH, EC 3.2.1.23/62) plays a significant role in the hydrolysis of  
581  $\beta$ -glycosylated anthraquinones to free anthraquinones (Fig. 4). This was demonstrated  
582 by the significant systemic exposure of free rhein (rather than  
583 rhein-8-*O*- $\beta$ -D-glucoside), with a short  $T_{max}$  value of 0.5 h, in rats after oral  
584 administration of rhein-8-*O*- $\beta$ -D-glucoside (Fig. S4). LPH is a primary  $\beta$ -glycosidase  
585 located in the intestinal microvillus membrane and is responsible for the extracellular  
586 hydrolysis of most  $\beta$ -glycosylated xenobiotics, such as glycosylated flavonoids [53].  
587 This hydrolase is predominantly expressed in the jejunum, with lower levels of  
588 expression in the proximal and distal ends of the intestines [54]. When the activity of  
589 intestinal LPH becomes inhibited or decreased,  $\beta$ -glycosylated anthraquinones reach  
590 the colon. It is presumed that the colonic concentration of free anthraquinones  
591 increased, resulting in a higher likelihood of inducing local drug effects. This can be  
592 attributed to the presence of colonic microbiota and the absence of intestinal uptake  
593 transporters, such as ABST [44, 45]. Therefore, by understanding the content and  
594 extraction of free and glycosylated anthraquinones in herbal medicines, as well as the  
595 role of LPH in their hydrolysis, researchers can better comprehend the potential  
596 therapeutic effects and mechanisms of action of these anthraquinone-containing  
597 medicinal plants.

598

## 599 **5. Conclusion**

600 In this investigation, we examined systemic exposure and targeted reachability of  
601 Dahuang compounds in humans through a multi-compound pharmacokinetic  
602 investigation of a Dahuang-containing medicine LianhuaQingwen. During the  
603 investigation, 55 constituents ( $\geq 0.01$   $\mu\text{mol/day}$ ), originating from Dahuang (*R.*  
604 *palmatum* rhizomes and roots), were identified and characterized in LianhuaQingwen.  
605 However, only three Dahuang compounds - rhein (**3**), methylisorhein (**10**), and  
606 4-*O*-methylgallic acid (**M42<sub>M2</sub>**) - exhibited significant systemic exposure in humans  
607 after dosing the capsule. Two absorption mechanisms for **3** and **10** across the small  
608 intestine have been proposed: active intestinal uptake of **3** and **10** by human  
609 ASBT/TAUT and human MRP1/3/4, and gut-luminal hydrolysis of  
610 rhein-8-*O*- $\beta$ -D-glucoside (**9**) by LPH, followed by the absorption of released **3** by the  
611 intestinal transporters. Another contributing factor to their significant systemic  
612 exposure was the poor metabolism of **3** and **10** in humans. In contrast, the other  
613 anthraquinones and their metabolites were either undetectable or present in low  
614 concentrations in human plasma. This can be attributed to their poor water solubility,  
615 low membrane permeability, and/or intestinal apical efflux, which hindered their  
616 absorption in the intestines. Additionally, targeted reachability of circulating **3** and **10**  
617 could be achieved as rat orthologues of human ASBT/TAUT was observed in alveolar  
618 epithelia and basolateral membrane of bronchial epithelia, where coronaviruses could  
619 infect and replicate. These two compounds showed potential ability to inhibit the  
620 3CL<sup>pro</sup> enzyme responsible for viral replication in coronaviruses. This suggested that  
621 the compounds had potential use in treating respiratory illnesses caused by  
622 coronaviruses. It is important to note that the circulating Dahuang anthraquinones and

623 tannins differed significantly between humans and rats after dosing LianhuaQingwen.  
624 This highlights the significance of considering interspecies differences when  
625 evaluating the safety and efficacy of the Dahuang-containing medicines. Overall, this  
626 investigation, along with similar studies on other components, contributes to defining  
627 the therapeutic benefits of Dahuang-containing medicines. It also underscores the  
628 need to establish conditions for the safe use of these medicines by considering  
629 interspecies differences.

630 **CRedit author statement**

631 **Nan-Nan Tian:** Investigation, Validation, Formal analysis, Visualization;  
632 **Ling-Ling Ren:** Investigation, Validation, Formal analysis, Visualization; **Ya-Xuan**  
633 **Zhu:** Investigation, Validation, Formal analysis; **Jing-Ya Sun:** Investigation, Formal  
634 analysis, Visualization; **Jun-Lan Lu:** Investigation, Validation; **Jia-Kai Zeng:**  
635 Investigation, Validation; **Feng-Qing Wang:** Investigation; **Fei-Fei Du:** Investigation;  
636 **Xi-He Yang:** Investigation; **Shu-Ning Ge:** Investigation; **Rui-Min Huang:**  
637 Conceptualization, Methodology, Formal analysis; **Wei-Wei Jia:** Investigation,  
638 Validation, Formal analysis, Visualization, Conceptualization, Methodology, Writing -  
639 Original draft preparation, Reviewing and Editing, Project administration, Funding  
640 acquisition; **Chuan Li:** Conceptualization, Methodology, Formal analysis, Writing -  
641 Original draft preparation, Reviewing and Editing, Supervision, Funding acquisition.

642 **Declaration of competing interest**

643 The authors declare that there are no conflicts of interest.

644 **Acknowledgements**

645 This work was funded by grants from the National Natural Science Foundation  
646 of China (Grant Nos.: 82074176 and 81503345), Innovation Team and Talents  
647 Cultivation Program of National Administration of Traditional Chinese Medicine  
648 (Grant No.: ZYYCXTD-C-202009), and the National Key R&D Program of China  
649 (Grant No.: 2018YFC1704500).

650 **Appendix A. Supplementary data**

651

## 652 References

- 653 [1]. H. Xiang, J.X. Zuo, F.Y. Guo, et al. What we already know about rhubarb: a comprehensive  
654 review, *Chinese Medicine* 15 (2020).
- 655 [2]. China Pharmacopoeia Commission. *Chinese Pharmacopoeia*. Beijing, China: China Medical  
656 Science Press; 2020:24-25.
- 657 [3]. K. Huang, P. Zhang, Z. Zhang, et al. Traditional Chinese Medicine (TCM) in the treatment of  
658 COVID-19 and other viral infections: Efficacies and mechanisms, *Pharmacol Ther* 225 (2021)  
659 107843.
- 660 [4]. W. Luo, X. Su, S. Gong, et al. Anti-SARS coronavirus 3C-like protease effects of *Rheum*  
661 *palmatum* L. extracts, *Biosci Trends* 3 (2009) 124-126.
- 662 [5]. S. Das, A. Singh, S.K. Samanta, et al. Naturally occurring anthraquinones as potential inhibitors of  
663 SARS-CoV-2 main protease: an integrated computational study, *Biologia (Bratisl)* 77 (2022)  
664 1121-1134.
- 665 [6]. T. Zhuang, X. Gu, N. Zhou, et al. Hepatoprotection and hepatotoxicity of Chinese herb Rhubarb  
666 (*Dahuang*): How to properly control the "General (Jiang Jun)" in Chinese medical herb, *Biomed*  
667 *Pharmacother* 127 (2020) 110224.
- 668 [7]. E.M. Clementi, F. Misiti. Potential health benefits of rhubarb. *Bioactive foods in promoting health:*  
669 Elsevier; 2010:407-423.
- 670 [8]. F. Zhang, R. Wu, Y.F. Liu, et al. Nephroprotective and nephrotoxic effects of Rhubarb and their  
671 molecular mechanisms, *Biomedicine & Pharmacotherapy* 160 (2023).
- 672 [9]. J.B. Wang, W.J. Kong, H.J. Wang, et al. Toxic effects caused by rhubarb (*Rheum palmatum* L.) are  
673 reversed on immature and aged rats, *J Ethnopharmacol* 134 (2011) 216-220.
- 674 [10]. Chinese National Health Commission and Chinese State Administration of Traditional Chinese  
675 Medicine. Diagnosis and treatment plan for influenza (2019 version). 2019.  
676 ([http://www.nhc.gov.cn/yzygj/s7653p/201911/a577415af4e5449cb30ecc6511e369c7/files/75a810](http://www.nhc.gov.cn/yzygj/s7653p/201911/a577415af4e5449cb30ecc6511e369c7/files/75a810713dc14dcd9e6db8b654bdef79.pdf)  
677 [713dc14dcd9e6db8b654bdef79.pdf](http://www.nhc.gov.cn/yzygj/s7653p/201911/a577415af4e5449cb30ecc6511e369c7/files/75a810713dc14dcd9e6db8b654bdef79.pdf))
- 678 [11]. National Health and Family Planning Commission of People's Republic of China. Guideline on  
679 diagnosis and treatment of Middle East respiratory syndrome (2015 version). *Chin J Viral Dis* 5  
680 (2015) 352-354.
- 681 [12]. K. Hu, W.J. Guan, Y. Bi, et al. Efficacy and safety of Lianhuaqingwen capsules, a repurposed  
682 Chinese herb, in patients with coronavirus disease 2019: A multicenter, prospective, randomized  
683 controlled trial, *Phytomedicine* 85 (2021) 153242.
- 684 [13]. L. Zhang, L. Wu, X. Xu, et al. Effectiveness of Lianhua Qingwen Capsule in Treatment of  
685 Asymptomatic COVID-19 Patients: A Randomized, Controlled Multicenter Trial, *J Integr*  
686 *Complement Med* 28 (2022) 887-894.
- 687 [14]. P. Shen, J. Li, S. Tu, et al. Positive effects of Lianhuaqingwen granules in COVID-19 patients: A  
688 retrospective study of 248 cases, *J Ethnopharmacol* 278 (2021) 114220.
- 689 [15]. S.J. Fan, J.K. Liao, L. Wei, et al. Treatment efficacy of Lianhua Qingwen capsules for early-stage  
690 COVID-19, *Am J Transl Res* 14 (2022) 1332-1338.
- 691 [16]. J. Wu, Q. Wang, L. Yang, et al. Potency of Lianhua Qingwen granule combined with paramivir  
692 sodium chloride injection in treating influenza and level changes of serum inflammatory factors,  
693 *Am J Transl Res* 13 (2021) 6790-6795.
- 694 [17]. L. Runfeng, H. Yunlong, H. Jicheng, et al. Lianhuaqingwen exerts anti-viral and  
695 anti-inflammatory activity against novel coronavirus (SARS-CoV-2), *Pharmacol Res* 156 (2020)  
696 104761.

- 697 [18].X. Chen, Y. Wu, C. Chen, et al. Identifying potential anti-COVID-19 pharmacological components  
698 of traditional Chinese medicine Lianhuaqingwen capsule based on human exposure and ACE2  
699 bi chromatography screening, *Acta Pharm Sin B* 11 (2021) 222-236.
- 700 [19].C. Li, W.W. Jia, J.L. Yang, et al. Multi-compound and drug-combination pharmacokinetic research  
701 on Chinese herbal medicines, *Acta Pharmacol Sin* 43 (2022) 3080-3095.
- 702 [20].X.F. Lan, O.E. Olaleye, J.L. Lu, et al. Pharmacokinetics-based identification of  
703 pseudoaldosterogenic compounds originating from *Glycyrrhiza uralensis* roots (Gancao) after  
704 dosing LianhuaQingwen capsule, *Acta Pharmacol Sin* 42 (2021) 2155-2172.
- 705 [21].T. Lu, J. Yang, X. Gao, et al. Plasma and urinary tanshinol from *Salvia miltiorrhiza* (Danshen) can  
706 be used as pharmacokinetic markers for cardiotonic pills, a cardiovascular herbal medicine, *Drug*  
707 *Metab Dispos* 36 (2008) 1578-1586.
- 708 [22].H. Liu, J. Yang, F. Du, et al. Absorption and disposition of ginsenosides after oral administration  
709 of *Panax notoginseng* extract to rats, *Drug Metab Dispos* 37 (2009) 2290-2298.
- 710 [23].F. Chen, L. Li, F. Xu, et al. Systemic and cerebral exposure to and pharmacokinetics of flavonols  
711 and terpene lactones after dosing standardized *Ginkgo biloba* leaf extracts to rats via different  
712 routes of administration, *Br J Pharmacol* 170 (2013) 440-457.
- 713 [24].Z. Hu, J. Yang, C. Cheng, et al. Combinatorial metabolism notably affects human systemic  
714 exposure to ginsenosides from orally administered extract of *Panax notoginseng* roots (Sanqi),  
715 *Drug Metab Dispos* 41 (2013) 1457-1469.
- 716 [25].M. Li, F. Wang, Y. Huang, et al. Systemic exposure to and disposition of catechols derived from  
717 *Salvia miltiorrhiza* roots (Danshen) after intravenous dosing DanHong injection in human subjects,  
718 rats, and dogs, *Drug Metab Dispos* 43 (2015) 679-690.
- 719 [26].C. Cheng, F. Du, K. Yu, et al. Pharmacokinetics and Disposition of Circulating Iridoids and  
720 Organic Acids in Rats Intravenously Receiving ReDuNing Injection, *Drug Metab Dispos* 44 (2016)  
721 1853-1858.
- 722 [27].C. Cheng, J.Z. Lin, L. Li, et al. Pharmacokinetics and disposition of monoterpene glycosides  
723 derived from *Paeonia lactiflora* roots (Chishao) after intravenous dosing of antiseptic XueBiJing  
724 injection in human subjects and rats, *Acta Pharmacol Sin* 37 (2016) 530-544.
- 725 [28].X. Li, C. Cheng, F. Wang, et al. Pharmacokinetics of catechols in human subjects intravenously  
726 receiving XueBiJing injection, an emerging antiseptic herbal medicine, *Drug Metab*  
727 *Pharmacokinet* 31 (2016) 95-98.
- 728 [29].X.W. Liu, J.L. Yang, W. Niu, et al. Human pharmacokinetics of ginkgo terpene lactones and  
729 impact of carboxylation in blood on their platelet-activating factor antagonistic activity, *Acta*  
730 *Pharmacol Sin* 39 (2018) 1935-1946.
- 731 [30].N. Zhang, C. Cheng, O.E. Olaleye, et al. Pharmacokinetics-Based Identification of Potential  
732 Therapeutic Phthalides from XueBiJing, a Chinese Herbal Injection Used in Sepsis Management,  
733 *Drug Metab Dispos* 46 (2018) 823-834.
- 734 [31].J.Y. Dai, J.L. Yang, C. Li. Transport and metabolism of flavonoids from Chinese herbal remedy  
735 Xiaochaihu- tang across human intestinal Caco-2 cell monolayers, *Acta Pharmacol Sin* 29 (2008)  
736 1086-1093.
- 737 [32].W. Jia, F. Du, X. Liu, et al. Renal tubular secretion of tanshinol: molecular mechanisms, impact on  
738 its systemic exposure, and propensity for dose-related nephrotoxicity and for renal herb-drug  
739 interactions, *Drug Metab Dispos* 43 (2015) 669-678.
- 740 [33].R. Jiang, J. Dong, X. Li, et al. Molecular mechanisms governing different pharmacokinetics of  
741 ginsenosides and potential for ginsenoside-perpetrated herb-drug interactions on OATP1B3, *Br J*  
742 *Pharmacol* 172 (2015) 1059-1073.
- 743 [34].B. Davies, T. Morris. Physiological parameters in laboratory animals and humans, *Pharm Res* 10  
744 (1993) 1093-1095.



- 745 [35].C.A. Lipinski. Drug-like properties and the causes of poor solubility and poor permeability, *J*  
746 *Pharmacol Toxicol Methods* 44 (2000) 235-249.
- 747 [36].W. Curatolo. Physical chemical properties of oral drug candidates in the discovery and exploratory  
748 development settings, *Pharmaceutical Science & Technology Today* 1 (1998) 387-393.
- 749 [37].C. Li, C. Cheng, W. Jia, et al. Multi-compound pharmacokinetic research on Chinese herbal  
750 medicines: identifying potentially therapeutic compounds and characterizing their disposition and  
751 pharmacokinetics, *Acta Pharmaceutica Sinica* 56 (2021) 2426-2446.
- 752 [38].P. V'Kovski, A. Kratzel, S. Steiner, et al. Coronavirus biology and replication: implications for  
753 SARS-CoV-2, *Nat Rev Microbiol* 19 (2021) 155-170.
- 754 [39].M.Z. Tay, C.M. Poh, L. Renia, et al. The trinity of COVID-19: immunity, inflammation and  
755 intervention, *Nat Rev Immunol* 20 (2020) 363-374.
- 756 [40].K. Anand, J. Ziebuhr, P. Wadhvani, et al. Coronavirus main proteinase (3CLpro) structure: basis  
757 for design of anti-SARS drugs, *Science* 300 (2003) 1763-1767.
- 758 [41].S. Ramamoorthy, F.H. Leibach, V.B. Mahesh, et al. Functional characterization and chromosomal  
759 localization of a cloned taurine transporter from human placenta, *Biochem J* 300 ( Pt 3) (1994)  
760 893-900.
- 761 [42].P. Singh, K. Gollapalli, S. Mangiola, et al. Taurine deficiency as a driver of aging, *Science* 380  
762 (2023) eabn9257.
- 763 [43].A.L. Craddock, M.W. Love, R.W. Daniel, et al. Expression and transport properties of the human  
764 ileal and renal sodium-dependent bile acid transporter, *Am J Physiol* 274 (1998) G157-169.
- 765 [44].M. Drozdziak, C. Groer, J. Penski, et al. Protein abundance of clinically relevant multidrug  
766 transporters along the entire length of the human intestine, *Mol Pharm* 11 (2014) 3547-3555.
- 767 [45].P. Hruz, C. Zimmermann, H. Gutmann, et al. Adaptive regulation of the ileal apical sodium  
768 dependent bile acid transporter (ASBT) in patients with obstructive cholestasis, *Gut* 55 (2006)  
769 395-402.
- 770 [46].M. Li, Q. Wang, Y. Li, et al. Apical sodium-dependent bile acid transporter, drug target for bile  
771 acid related diseases and delivery target for prodrugs: Current and future challenges, *Pharmacol*  
772 *Ther* 212 (2020) 107539.
- 773 [47].D. Stary, M. Bajda. Taurine and Creatine Transporters as Potential Drug Targets in Cancer Therapy,  
774 *International Journal of Molecular Sciences* 24 (2023) 3788.
- 775 [48].R. Song, L. Xu, F. Xu, et al. In vivo metabolism study of rhubarb decoction in rat using  
776 high-performance liquid chromatography with UV photodiode-array and mass-spectrometric  
777 detection: a strategy for systematic analysis of metabolites from traditional Chinese medicines in  
778 biological samples, *J Chromatogr A* 1217 (2010) 7144-7152.
- 779 [49].C.S. Shia, S.H. Juang, S.Y. Tsai, et al. Metabolism and pharmacokinetics of anthraquinones in  
780 *Rheum palmatum* in rats and ex vivo antioxidant activity, *Planta Med* 75 (2009) 1386-1392.
- 781 [50].J.H. Lee, J.M. Kim, C. Kim. Pharmacokinetic analysis of rhein in *Rheum undulatum* L, *J*  
782 *Ethnopharmacol* 84 (2003) 5-9.
- 783 [51].Y. Xu, X. Mao, B. Qin, et al. In vitro and in vivo metabolic activation of rhein and characterization  
784 of glutathione conjugates derived from rhein, *Chem Biol Interact* 283 (2018) 1-9.
- 785 [52].K. Komatsu, Y. Nagayama, K. Tanaka, et al. Comparative study of chemical constituents of  
786 rhubarb from different origins, *Chem Pharm Bull (Tokyo)* 54 (2006) 1491-1499.
- 787 [53].H. Elferink, J.P.J. Bruckers, G.H. Veeneman, et al. A comprehensive overview of substrate  
788 specificity of glycoside hydrolases and transporters in the small intestine : "A gut feeling", *Cell*  
789 *Mol Life Sci* 77 (2020) 4799-4826.
- 790 [54].J.T. Troelsen. Adult-type hypolactasia and regulation of lactase expression, *Biochim Biophys Acta*  
791 1723 (2005) 19-32.

792  
793**Table 1**  
Dahuang compounds, unchanged and metabolized, detected in human samples after orally dosing LianhuaQingwen.

| Compound (ID)                                                    | LC/TOF-MS <sup>E</sup> data |                                   |                  |                                      | Molecular formula                               | Presence in human samples |
|------------------------------------------------------------------|-----------------------------|-----------------------------------|------------------|--------------------------------------|-------------------------------------------------|---------------------------|
|                                                                  | <i>t</i> <sub>R</sub> (min) | [M-H] <sup>-</sup> ( <i>m/z</i> ) | Mass error (ppm) | Fragmentation profile ( <i>m/z</i> ) |                                                 |                           |
| Chrysophanol ( <b>1</b> )                                        | 27.14                       | 253.0511                          | 4.0              | 225.0569, 183.0091                   | C <sub>15</sub> H <sub>10</sub> O <sub>4</sub>  | Plasma, urine             |
| Chrysophanol-1- <i>O</i> -glucuronide ( <b>M1<sub>G1</sub></b> ) | 19.24                       | 429.0815                          | -1.6             | 253.0507, 225.0492, 183.0077         | C <sub>21</sub> H <sub>18</sub> O <sub>10</sub> | Plasma, urine             |
| Chrysophanol-8- <i>O</i> -glucuronide ( <b>M1<sub>G2</sub></b> ) | 19.41                       | 429.0822                          | 0                | 253.0505, 225.0708, 183.0178         | C <sub>21</sub> H <sub>18</sub> O <sub>10</sub> | Plasma, urine             |
| Emodin- <i>O</i> -β-D-glucoside ( <b>2</b> )                     | 18.94                       | 431.0966                          | -2.8             | 269.0443, 225.1192                   | C <sub>21</sub> H <sub>20</sub> O <sub>10</sub> | Plasma                    |
| Rhein ( <b>3</b> )                                               | 23.61                       | 283.0247                          | 1.4              | 239.0348, 211.0422, 183.0411         | C <sub>15</sub> H <sub>18</sub> O <sub>6</sub>  | Plasma, urine             |
| Rhein- <i>O</i> -glucuronide-1 ( <b>M3<sub>G1</sub></b> )        | 15.23                       | 459.0563                          | -0.2             | 283.0244, 239.0339                   | C <sub>21</sub> H <sub>16</sub> O <sub>12</sub> | Plasma, urine             |
| Rhein- <i>O</i> -glucuronide-2 ( <b>M3<sub>G2</sub></b> )        | 16.93                       | 459.0555                          | -2.0             | 283.0234, 239.0352                   | C <sub>21</sub> H <sub>16</sub> O <sub>12</sub> | Urine                     |
| Emodin ( <b>5</b> )                                              | 26.01                       | 269.0455                          | 1.9              | 241.0667, 225.0515, 197.0307         | C <sub>15</sub> H <sub>10</sub> O <sub>5</sub>  | Plasma, urine             |
| Emodin- <i>O</i> -glucuronide ( <b>M5<sub>G2</sub></b> )         | 19.53                       | 445.0764                          | -1.6             | 269.0394, 225.0772                   | C <sub>21</sub> H <sub>18</sub> O <sub>11</sub> | Plasma, urine             |
| Emodin-3- <i>O</i> -glucuronide ( <b>M5<sub>G3</sub></b> )       | 21.24                       | 445.0776                          | 1.1              | 269.0451, 225.0622                   | C <sub>21</sub> H <sub>18</sub> O <sub>11</sub> | Plasma, urine             |
| Physcion ( <b>8</b> )                                            | 28.60                       | 283.0605                          | -0.4             | 240.0323                             | C <sub>16</sub> H <sub>12</sub> O <sub>5</sub>  | Urine                     |
| Physcion-1- <i>O</i> -glucuronide ( <b>M8<sub>G1</sub></b> )     | 20.92                       | 459.0924                          | -0.7             | 283.0599                             | C <sub>22</sub> H <sub>20</sub> O <sub>11</sub> | Plasma                    |
| Physcion-8- <i>O</i> -glucuronide ( <b>M8<sub>G2</sub></b> )     | 21.42                       | 459.0923                          | -0.9             | 283.0607                             | C <sub>22</sub> H <sub>20</sub> O <sub>11</sub> | Plasma, urine             |
| Methylisorhein ( <b>10</b> )                                     | 21.93                       | 297.0392                          | -2.4             | 253.0485                             | C <sub>16</sub> H <sub>10</sub> O <sub>6</sub>  | Plasma, urine             |
| Aloe-emodin ( <b>11</b> )                                        | 21.81                       | 269.0457                          | 2.6              | 240.0364, 211.1301, 183.0977         | C <sub>15</sub> H <sub>10</sub> O <sub>5</sub>  | Plasma, urine             |
| Gallic acid ( <b>42</b> )                                        | 3.73                        | 169.0137                          | 0                | 125.0227, 78.9810                    | C <sub>7</sub> H <sub>6</sub> O <sub>5</sub>    | Plasma, urine             |
| 3- <i>O</i> -Methylgallic acid ( <b>M42<sub>M1</sub></b> )       | 7.65                        | 183.0297                          | 2.2              | 168.0056, 139.0397, 124.0153         | C <sub>8</sub> H <sub>8</sub> O <sub>5</sub>    | Plasma, urine             |
| 4- <i>O</i> -Methylgallic acid ( <b>M42<sub>M2</sub></b> )       | 8.05                        | 183.0299                          | 3.3              | 168.0064, 139.0371, 124.0163         | C <sub>8</sub> H <sub>8</sub> O <sub>5</sub>    | Plasma, urine             |
| 2,5-Dimethyl-7-hydroxychrome ( <b>91</b> )                       | 16.38                       | 189.0556                          | 2.1              | 174.0307, 146.0338                   | C <sub>11</sub> H <sub>10</sub> O <sub>3</sub>  | Plasma, urine             |

The details of human and rat studies and bioanalytical assay are described in the [Supplementary Materials and methods](#).

794  
795**Table 2**  
Pharmacokinetics of rhein (**3**), methylisorhein (**10**), and 4-*O*-methylgallic acid (**M42M2**) in volunteers orally receiving LianhuaQingwen.

| Pharmacokinetics                     | On day 1       |                 | On day 8       |                 |
|--------------------------------------|----------------|-----------------|----------------|-----------------|
|                                      | Male (m1–m8)   | Female (f9–f14) | Male (m1–m8)   | Female (f9–f14) |
| <i>Rhein (2)</i>                     |                |                 |                |                 |
| $C_{\max}$ (nmol/L)                  | 239.9 ± 68.6   | 286.7 ± 65.7    | 149.5 ± 30.6   | 277.0 ± 153.7   |
| $T_{\text{peak}}$ (h)                | 2.5 ± 0.9      | 3.0 ± 0         | 3.1 ± 1.4      | 2.7 ± 0.8       |
| AUC <sub>0–24h</sub> (h·nmol/L)      | 1469.3 ± 362.0 | 2103.9 ± 629.6  | 1013.3 ± 328.8 | 1933.6 ± 910.7  |
| AUC <sub>0–∞</sub> (h·nmol/L)        | 1494.1 ± 368.9 | 2168.8 ± 659.2  | 1050.4 ± 370.3 | 2006.5 ± 934.9  |
| MRT (h)                              | 6.9 ± 1.2      | 7.5 ± 1.7       | 7.4 ± 1.6      | 7.6 ± 1.6       |
| $t_{1/2}$ (h)                        | 3.8 ± 0.7      | 4.8 ± 2.1       | 4.6 ± 0.8      | 4.2 ± 0.6       |
| $Cum.A_{e-U,0-48h}$ (nmol/kg)        | 7.9 ± 2.5      | 9.4 ± 3.9       | 8.5 ± 3.4      | 7.1 ± 1.9       |
| CL <sub>R</sub> (mL/h/kg)            | 5.6 ± 1.6      | 4.6 ± 1.8       | 9.0 ± 4.7      | 4.5 ± 2.6       |
| $R_{rc}$                             | 5.3 ± 1.5      | 4.3 ± 1.7       | 8.4 ± 4.3      | 4.2 ± 2.4       |
| <i>Methylisorhein (10)</i>           |                |                 |                |                 |
| $C_{\max}$ (nmol/L)                  | 84.0 ± 16.5    | 126.6 ± 25.6    | 50.3 ± 11.0    | 115.2 ± 66.4    |
| $T_{\text{peak}}$ (h)                | 4.5 ± 1.6      | 4.0 ± 1.5       | 4.9 ± 2.2      | 5.5 ± 2.3       |
| AUC <sub>0–24h</sub> (h·nmol/L)      | 899.9 ± 180.2  | 1342.4 ± 339.3  | 624.3 ± 181.7  | 1210.6 ± 497.6  |
| AUC <sub>0–∞</sub> (h·nmol/L)        | 1128.8 ± 264.6 | 1659.0 ± 486.6  | 767.2 ± 232.1  | 1418.2 ± 596.3  |
| MRT (h)                              | 15.4 ± 3.0     | 17.8 ± 3.9      | 16.8 ± 2.4     | 13.8 ± 2.1      |
| $t_{1/2}$ (h)                        | 9.5 ± 1.7      | 9.3 ± 1.3       | 9.1 ± 1.3      | 7.9 ± 0.7       |
| $Cum.A_{e-U,0-48h}$ (nmol/kg)        | 2.0 ± 0.8      | 3.6 ± 1.2       | 3.1 ± 1.4      | 3.6 ± 1.2       |
| CL <sub>R</sub> (mL/h/kg)            | 2.2 ± 0.8      | 2.8 ± 1.1       | 5.5 ± 3.1      | 3.4 ± 1.8       |
| $R_{rc}$                             | 2.1 ± 0.8      | 2.6 ± 1.0       | 5.1 ± 2.9      | 3.2 ± 1.7       |
| <i>4-O-Methylgallic acid (M42M2)</i> |                |                 |                |                 |
| $C_{\max}$ (nmol/L)                  | 119.0 ± 32.6   | 139.3 ± 32.7    | 96.7 ± 13.2    | 80.4 ± 21.2     |
| $T_{\text{peak}}$ (h)                | 3.0 ± 0        | 2.7 ± 0.8       | 3.0 ± 0        | 3.0 ± 0         |
| AUC <sub>0–24h</sub> (h·nmol/L)      | 463.0 ± 90.7   | 538.1 ± 99.4    | 341.6 ± 54.3   | 318.6 ± 86.3    |
| AUC <sub>0–∞</sub> (h·nmol/L)        | 466.7 ± 91.0   | 540.1 ± 100.4   | 349.7 ± 55.9   | 320.7 ± 86.6    |
| MRT (h)                              | 4.3 ± 0.4      | 3.8 ± 0.5       | 4.4 ± 0.5      | 4.0 ± 0.4       |
| $t_{1/2}$ (h)                        | 1.4 ± 0.2      | 1.2 ± 0.4       | 1.9 ± 0.3      | 1.3 ± 0.3       |
| $Cum.A_{e-U,0-48h}$ (nmol/kg)        | 55.9 ± 19.9    | 86.7 ± 25.8     | 53.9 ± 14.2    | 46.9 ± 25.2     |
| CL <sub>R</sub> (mL/h/kg)            | 124.6 ± 49.3   | 159.6 ± 34.2    | 162.2 ± 49.8   | 142.6 ± 63.6    |

|          |               |               |               |               |
|----------|---------------|---------------|---------------|---------------|
| $R_{fc}$ | $2.8 \pm 1.1$ | $3.6 \pm 0.8$ | $3.6 \pm 1.1$ | $3.2 \pm 1.4$ |
|----------|---------------|---------------|---------------|---------------|

796  $C_{max}$ , maximum plasma concentration;  $T_{peak}$ , the time taken to achieve the peak plasma concentration; AUC, area under the plasma concentration-time curve after dosing;  
797 MRT, mean residence time;  $t_{1/2}$ , terminal half-life;  $Cum.A_{e-U}$ , cumulative amount excreted into urine;  $CL_R$ , renal excretory clearance.

798 **Table 3**  
 799 Passive diffusion of Dahuang compounds in mock HEK-293 cells and their net transport ratios in HEK-293 cells transfected with various human intestinal or renal  
 800 transporters.

| Compound (ID)                                                | Transport in mock cell<br>( $\mu\text{L}/\text{min}/\text{mg}$ protein) | Net transport ratio |               |                |                |                |                |               |               |                |                |
|--------------------------------------------------------------|-------------------------------------------------------------------------|---------------------|---------------|----------------|----------------|----------------|----------------|---------------|---------------|----------------|----------------|
|                                                              |                                                                         | TAUT                | ASBT          | OATP2B1        | PEPT1          | OAT1           | OAT2           | OAT3          | OAT4          | OCT2           | PEPT2          |
| Positive substrate                                           | —                                                                       | $7.2 \pm 1.5$       | $200 \pm 38$  | $12.3 \pm 2.4$ | $17.6 \pm 2.1$ | $476 \pm 57$   | $24.1 \pm 3.6$ | $4.5 \pm 0.3$ | $7.6 \pm 1.3$ | $14.5 \pm 2.6$ | $54.9 \pm 3.9$ |
| Chrysophanol ( <b>1</b> )                                    | $8.8 \pm 1.1$                                                           | $1.0 \pm 0.1$       | $0.9 \pm 0.5$ | $0.9 \pm 0.3$  | $2.2 \pm 0.2$  | —              | —              | —             | —             | —              | —              |
| Emodin-8- <i>O</i> - $\beta$ -D-glucoside ( <b>2</b> )       | $0.1 \pm 0.0$                                                           | $2.1 \pm 0.3$       | $0.8 \pm 0.1$ | $3.6 \pm 0.1$  | $0.9 \pm 0.1$  | —              | —              | —             | —             | —              | —              |
| Rhein ( <b>3</b> )                                           | $0.2 \pm 0.0$                                                           | $18.4 \pm 2.7$      | $5.9 \pm 0.7$ | $1.0 \pm 0$    | $0.7 \pm 0.1$  | $9.9 \pm 1.0$  | $8.4 \pm 0.3$  | $1.1 \pm 0.1$ | $1.8 \pm 0.3$ | $1.0 \pm 0.2$  | $1.7 \pm 0.3$  |
| Chrysophanol-8- <i>O</i> - $\beta$ -D-glucoside ( <b>4</b> ) | $1.5 \pm 0.2$                                                           | $0.8 \pm 0.1$       | $1.4 \pm 0.1$ | $2.0 \pm 0.4$  | $0.8 \pm 0.1$  | —              | —              | —             | —             | —              | —              |
| Emodin ( <b>5</b> )                                          | $27.8 \pm 1.6$                                                          | $1.0 \pm 0.1$       | $1.7 \pm 0.4$ | $1.6 \pm 0.1$  | $0.8 \pm 0.2$  | —              | —              | —             | —             | —              | —              |
| Physcion-8- <i>O</i> - $\beta$ -D-glucoside ( <b>6</b> )     | $6.0 \pm 1.2$                                                           | $0.7 \pm 0.1$       | $1.0 \pm 0.3$ | $1.2 \pm 0.2$  | $0.8 \pm 0.1$  | —              | —              | —             | —             | —              | —              |
| Chrysophanol-1- <i>O</i> - $\beta$ -D-glucoside ( <b>7</b> ) | $1.4 \pm 0.1$                                                           | $1.3 \pm 0.4$       | $1.2 \pm 0.1$ | $0.7 \pm 0$    | $1.5 \pm 0.6$  | —              | —              | —             | —             | —              | —              |
| Physcion ( <b>8</b> )                                        | $9.4 \pm 2.4$                                                           | $0.8 \pm 0.1$       | $1.8 \pm 0.4$ | $1.1 \pm 0.1$  | $1.2 \pm 0.2$  | —              | —              | —             | —             | —              | —              |
| Rhein-8- <i>O</i> - $\beta$ -D-glucoside ( <b>9</b> )        | $0.02 \pm 0$                                                            | $0.8 \pm 0.1$       | $0.7 \pm 0.4$ | $0.7 \pm 0$    | $0.9 \pm 0.1$  | —              | —              | —             | —             | —              | —              |
| Methylisorhein ( <b>10</b> )                                 | $0.1 \pm 0.0$                                                           | $7.7 \pm 0.4$       | $3.1 \pm 0.3$ | $2.4 \pm 0.1$  | $2.2 \pm 0.1$  | $8.1 \pm 0.6$  | $11.8 \pm 0.3$ | $5.7 \pm 0.0$ | $4.9 \pm 1.1$ | $1.3 \pm 0.1$  | $1.2 \pm 0.3$  |
| Aloe-emodin ( <b>11</b> )                                    | $24.8 \pm 3.1$                                                          | $1.1 \pm 0.3$       | $1.2 \pm 0.2$ | $1.0 \pm 0.1$  | $1.4 \pm 0.2$  | —              | —              | —             | —             | —              | —              |
| Gallic acid ( <b>42</b> )                                    | $0.01 \pm 0$                                                            | $1.1 \pm 0.2$       | $1.2 \pm 0.4$ | $1.6 \pm 0.5$  | $0.5 \pm 0$    | —              | —              | —             | —             | —              | —              |
| 4- <i>O</i> -methylgallic acid ( <b>M42<sub>M2</sub></b> )   | $0.03 \pm 0$                                                            | —                   | —             | —              | $0.9 \pm 0.3$  | $73.2 \pm 3.3$ | $20.1 \pm 0.8$ | $5.5 \pm 0.6$ | $1.5 \pm 0.1$ | $0.6 \pm 0.2$  | $1.1 \pm 0.2$  |

801 For assessment of cellular uptake mediated by intestinal or renal transporters, differential transport rates between transfected cells and mock cells were defined as a net  
 802 transport ratio, which represents the mean  $\pm$  standard deviation ( $n = 3$ ). A net transport ratio  $> 3$  suggested a positive result. Positive substrates were taurocholic acid (ASBT),  
 803 [ $\text{H}^3$ ]-taurine (TAUT), estrone-3-sulfate (OATP2B1/OAT3/OAT4), glycylsarcosine (PEPT1/PEPT2), *para*-aminohippuric acid (OAT1), prostaglandin  $\text{F}_{2a}$  (OAT2),  
 804 tetraethylammonium (OCT2) and their final concentrations were  $20 \mu\text{mol}/\text{L}$  with incubation time of 10 min.

805  
806

**Table 4**  
Apparent permeability for the investigational Dahuang compounds in Caco-2 cell monolayers.

| Compound                                                     | Without inhibitors                 |                    |      | With inhibitors                    |                    |     |
|--------------------------------------------------------------|------------------------------------|--------------------|------|------------------------------------|--------------------|-----|
|                                                              | $P_{app}$ ( $\times 10^{-6}$ cm/s) |                    | EfR  | $P_{app}$ ( $\times 10^{-6}$ cm/s) |                    | EfR |
|                                                              | Apical→Basolateral                 | Basolateral→Apical |      | Apical→Basolateral                 | Basolateral→Apical |     |
| Atenolol                                                     | 0.8 ± 0.1                          | 0.7 ± 0.1          | 0.9  | —                                  | —                  | —   |
| Antipyrine                                                   | 33.1 ± 7.8                         | 36.6 ± 6.4         | 1.1  | —                                  | —                  | —   |
| Rhodamine 123                                                | 0.8 ± 0.1                          | 10.9 ± 1.2         | 14.0 | 0.3 ± 0.0                          | 0.6 ± 0.0          | 1.9 |
| Sulfasalazine                                                | 0.6 ± 0.0                          | 10.7 ± 1.7         | 17.5 | 0.8 ± 0.0                          | 1.6 ± 0.1          | 1.9 |
| Estrone-3-sulfate                                            | 0.8 ± 0.2                          | 7.4 ± 0.1          | 9.3  | 1.7 ± 0.1                          | 1.4 ± 0.1          | 0.8 |
| Chrysophanol ( <b>1</b> )                                    | 2.0 ± 0.5                          | 3.9 ± 0.1          | 2.0  | —                                  | —                  | —   |
| Emodin-8- <i>O</i> - $\beta$ -D-glucoside ( <b>2</b> )       | 0.2 ± 0.0                          | 2.7 ± 0.2          | 14.8 | 0.3 ± 0.1                          | 0.9 ± 0.0          | 2.8 |
| Rhein ( <b>3</b> )                                           | 5.5 ± 0.6                          | 34.2 ± 1.8         | 6.3  | 7.8 ± 0.9                          | 17.0 ± 4.7         | 2.2 |
| Chrysophanol-8- <i>O</i> - $\beta$ -D-glucoside ( <b>4</b> ) | 6.1 ± 0.2                          | 25.6 ± 7.7         | 4.2  | 11.7 ± 0.9                         | 10.2 ± 0.5         | 0.9 |
| Emodin ( <b>5</b> )                                          | 18.6 ± 1.3                         | 16.5 ± 4.0         | 0.9  | —                                  | —                  | —   |
| Physcion-8- <i>O</i> - $\beta$ -D-glucoside ( <b>6</b> )     | 0.6 ± 0.0                          | 8.9 ± 1.3          | 14.9 | 1.2 ± 0.2                          | 4.3 ± 0.9          | 3.5 |
| Chrysophanol-1- <i>O</i> - $\beta$ -D-glucoside ( <b>7</b> ) | 3.8 ± 0.5                          | 22.0 ± 2.0         | 5.8  | 9.0 ± 0.2                          | 7.2 ± 2.1          | 0.8 |
| Physcion ( <b>8</b> )                                        | 0.4 ± 0.0                          | 0.3 ± 0.0          | 0.9  | —                                  | —                  | —   |
| Rhein-8- <i>O</i> - $\beta$ -D-glucoside ( <b>9</b> )        | 0.3 ± 0.0                          | 0.3 ± 0.1          | 1.1  | —                                  | —                  | —   |
| Methylisorhein ( <b>10</b> )                                 | 1.4 ± 0.1                          | 34.0 ± 3.7         | 24.0 | 4.0 ± 1.4                          | 10.6 ± 2.3         | 2.6 |
| Aloe-emodin ( <b>11</b> )                                    | 37.1 ± 3.6                         | 32.4 ± 2.2         | 0.9  | —                                  | —                  | —   |

807 Antipyrine, high permeability reference compound; atenolol, low permeability reference compound; rhodamine 123, P-gp probe substrate; sulfasalazine, MRP2 probe  
808 substrate; estrone-3-sulfate, BCRP probe substrate. Inhibitors, the mixture of verapamil (P-gp inhibitor), MK571 (MRP2 inhibitor), and novobiocin (BCRP inhibitor). An  
809 efflux ratio (EfR) greater than 3 was considered as a positive result, suggesting that the investigational compound was an *in vitro* substrate of efflux transporter(s).

810 **Figure captions:**

811 **Fig. 1.** LianhuaQingwen constituents originating from Dahuang. (A) stacked liquid  
812 chromatograms of anthraquinones (1–22), anthrones (31–34), tannins (41–52),  
813 flavonoids (61–64), naphthalenes (71–73), stilbenes (81–84), pyranones (91–94), and  
814 phenylbutanones (101 and 102), detected by mass spectrometry, in a typical sample of  
815 LianhuaQingwen; (B) constituents detected in a sample of raw material of Dahuang  
816 (*Rheum palmatum* rhizomes and roots); (C) mean content levels of the constituents  
817 detected in samples of 14 lots of LianhuaQingwen; (D) daily doses of the constituents  
818 from the lot A1802055 of LianhuaQingwen at the label daily dose 4.2 g/day; (E)  
819 percentage daily doses of anthraquinones, anthrones, tannins, flavonoids,  
820 naphthalenes, stilbenes, pyranones, and phenylbutanones in their respective total daily  
821 dose of all the constituents of the class detected in LianhuaQingwen. **1**, chrysophanol;  
822 **2**, emodin-8-*O*- $\beta$ -D-glucoside; **3**, rhein; **4**, chrysophanol-8-*O*- $\beta$ -D-glucoside; **5**,  
823 emodin; **6**, physcion-8-*O*- $\beta$ -D-glucoside; and **10**, methylisorhein. The names of the  
824 other 48 constituents originating from Dahuang are shown in [Table S3](#). The details of  
825 composition analysis of LianhuaQingwen for constituents originating from Dahuang  
826 are described in the [Supplementary Materials and methods](#).

827 **Fig. 2.** Dahuang compounds detected in healthy volunteers and rats after orally dosing  
828 LianhuaQingwen. (A and C) systemic exposure data; (B and D) renal excretion data;  
829 (E) hepatobiliary excretion data. The dose for human volunteers was 12  
830 capsules/person (A and B), while that for rats was 3.78 g/kg (C–E). Both unchanged  
831 and metabolized Dahuang compounds were detected. **3**, rhein; **10**, methylisorhein,  
832 **M42<sub>M2</sub>**, 4-*O*-methylgallic acid. The names of the other Dahuang compounds detected  
833 are shown in [Table 1](#).

834 **Fig. 3** Plasma concentration-time profiles of rhein (A and B), methylisorhein (C and  
835 D), and 4-*O*-methylgallic acid (E and F) in volunteers after dosing LianhuaQingwen

836 at 12 capsules/person. Solid dots, data of males; Open dots, data of females.  
837 Pharmacokinetic data of these compounds are shown [Table 2](#).

838 **Fig. 4** *In vitro* human LPH-mediated deglycosylation of Dahuang anthraquinone  
839 glycosides. LPH-mediated deglycosylation of the positive substrate phlorizin to  
840 phloretin (A) and Dahuang compounds emodin-8-*O*- $\beta$ -D-glucoside to emodin (B),  
841 chrysophanol-8-*O*- $\beta$ -D-glucoside to chrysophanol (C), physcion-8-*O*- $\beta$ -D-glucoside  
842 to physcion (D), chrysophanol-1-*O*- $\beta$ -D-glucoside to chrysophanol (E), and  
843 rhein-8-*O*- $\beta$ -D-glucoside to rhein (F). Solid dots, glycosides; open dots, aglycones.  
844 Other *in vitro* metabolism data of Dahuang compounds are shown in [Supplementary](#)  
845 [Fig. S1](#).

846 **Fig. 5** Inhibitory activities against of Dahuang compounds against SARS-CoV-2  
847 3CL<sup>pro</sup>. (A) Percentage inhibition of 3CL<sup>pro</sup> by circulating Dahuang compounds at 100  
848  $\mu$ mol/L. (B) IC<sub>50</sub> of positive drug ebselen against 3CL<sup>pro</sup>. (C and D) IC<sub>50</sub> of rhein and  
849 methylisorhein against 3CL<sup>pro</sup>, respectively.

850 **Fig. 6** Expression and cellular localization of Taut and Asbt proteins in the rat  
851 intestine and lung. (A) Western blot analysis of human ASBT, rat Asbt, human TAUT,  
852 or rat Taut proteins in the transfected HEK-293 cells. Representative autoradiographs  
853 of the Western blots demonstrating 40-kDa human ASBT and rat Asbt protein bands  
854 in the homogenates of human ASBT- and rat Asbt-transfected HEK293 cells,  
855 respectively. Similarly, 65-kDa human TAUT and rat Taut proteins are observed in the  
856 homogenates of human TAUT- and rat Taut-transfected HEK293 cells, respectively.  
857 (B) Western blot analysis of Asbt and Taut proteins in rat lung, liver, and intestine  
858 tissues. In the homogenates of these tissues, 40-kDa Asbt protein bands and 65-kDa  
859 Taut protein bands are detected in rat bronchus, lung, liver, and intestine. (C)  
860 Immunohistochemical localization of Asbt and Taut proteins in rat intestine and lung  
861 tissues.



862  
863  
864  
865  
866  
867  
868  
869  
870  
871  
872  
873  
874  
875  
876  
877  
878  
879  
880  
881  
882  
883  
884  
885  
886  
887  
888  
889  
890  
891  
892  
893  
894  
895  
896  
897  
898  
899  
900  
901  
902  
903  
904

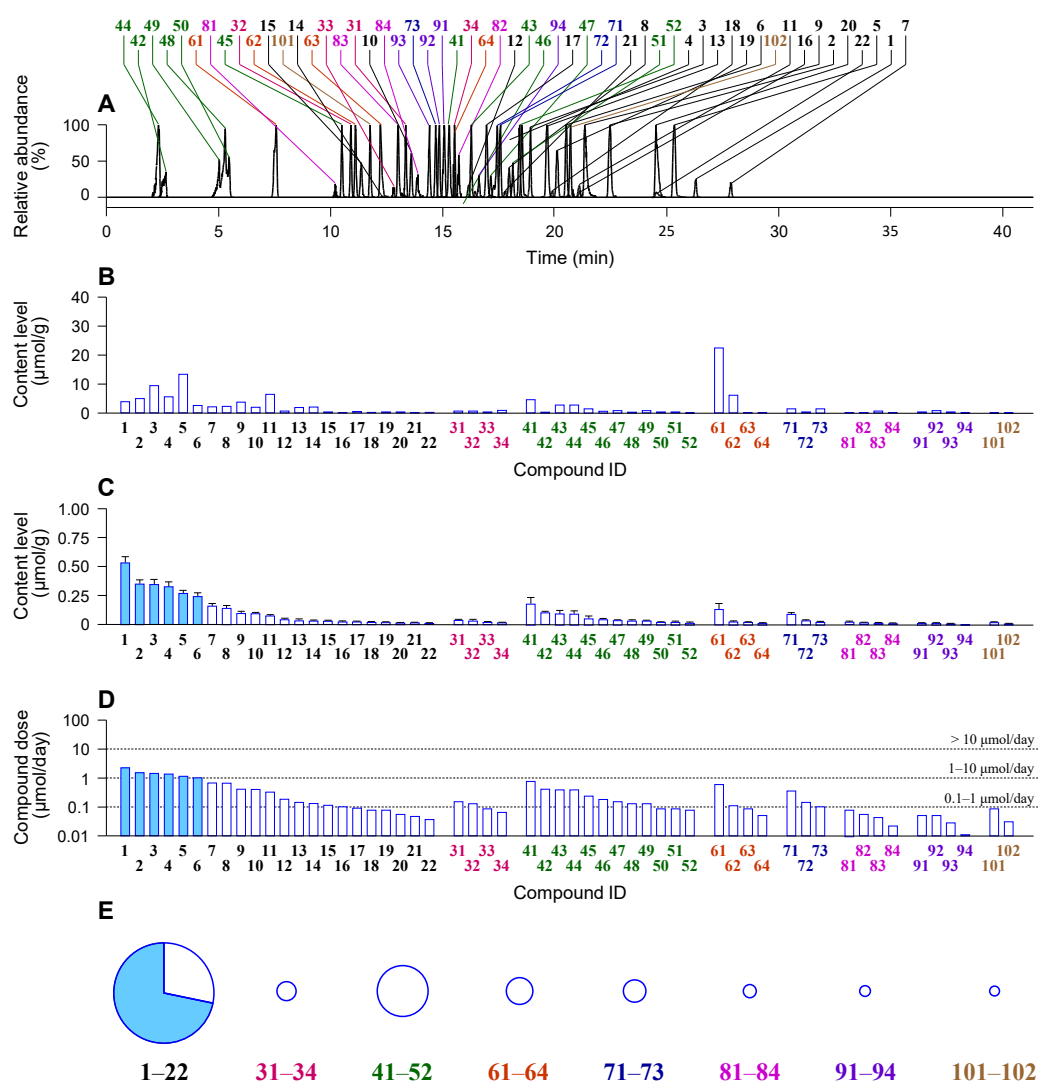

**Fig. 1.** LianhuaQingwen constituents originating from Dahuang. (A) stacked liquid chromatograms of anthraquinones (1–22), anthrones (31–34), tannins (41–52), flavonoids (61–64), naphthalenes (71–73), stilbenes (81–84), pyranones (91–94), and phenylbutanones (101 and 102), detected by mass spectrometry, in a typical sample of LianhuaQingwen; (B) constituents detected in a sample of raw material of Dahuang (*Rheum palmatum* rhizomes and roots); (C) mean content levels of the constituents detected in samples of 14 lots of LianhuaQingwen; (D) daily doses of the constituents from the lot A1802055 of LianhuaQingwen at the label daily dose 4.2 g/day; (E) percentage daily doses of anthraquinones, anthrones, tannins, flavonoids, naphthalenes, stilbenes, pyranones, and phenylbutanones in their respective total daily dose of all the constituents of the class detected in LianhuaQingwen. 1, chrysophanol; 2, emodin-8-*O*- $\beta$ -D-glucoside; 3, rhein; 4, chrysophanol-8-*O*- $\beta$ -D-glucoside; 5, emodin; 6, physcion-8-*O*- $\beta$ -D-glucoside; and 10, methylisorhein. The names of the other 48 constituents originating from Dahuang are shown in [Table S3](#). The details of composition analysis of LianhuaQingwen for constituents originating from Dahuang are described in the [Supplementary Materials and methods](#).

905  
906  
907  
908  
909  
910  
911  
912  
913  
914  
915  
916  
917  
918  
919  
920  
921  
922  
923  
924  
925  
926  
927  
928  
929  
930

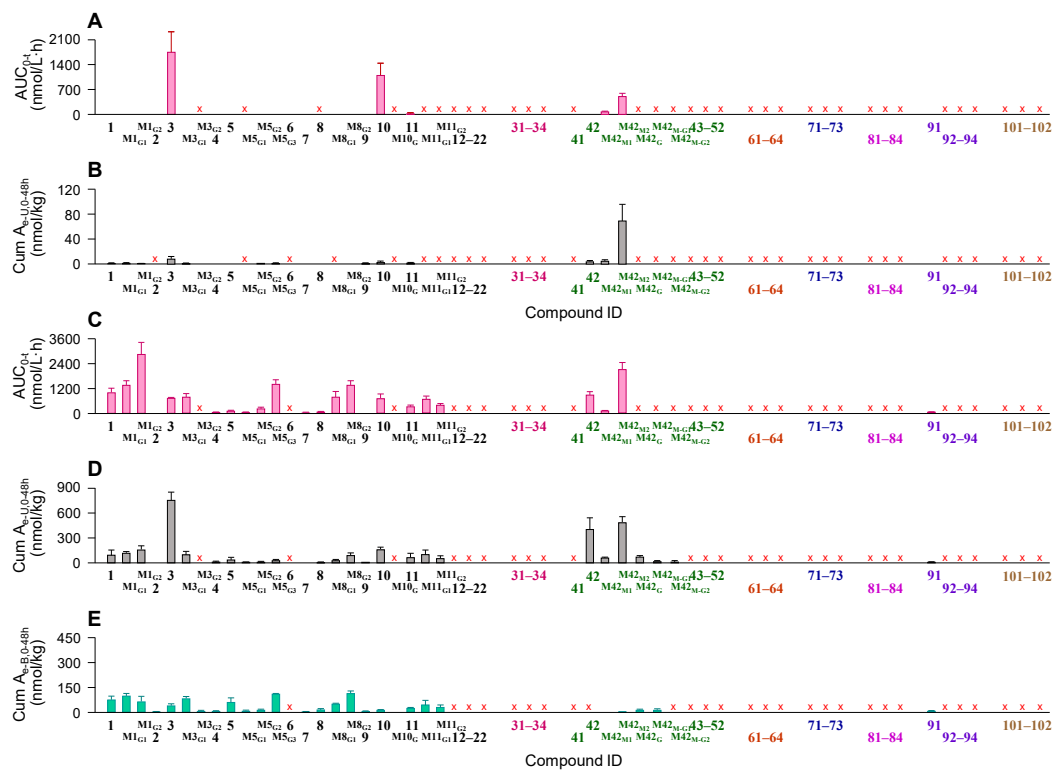

**Fig. 2.** Dahuang compounds detected in healthy volunteers and rats after orally dosing LianhuaQingwen. (A and C) systemic exposure data; (B and D) renal excretion data; (E) hepatobiliary excretion data. The dose for human volunteers was 12 capsules/person (A and B), while that for rats was 3.78 g/kg (C–E). Both unchanged and metabolized Dahuang compounds were detected. **3**, rhein; **10**, methylisorhein, **M42M<sub>2</sub>**, 4-*O*-methylgallic acid. The names of the other Dahuang compounds detected are shown in Table 1.

931  
932  
933  
934  
935  
936  
937  
938  
939  
940  
941  
942  
943  
944  
945  
946  
947  
948  
949

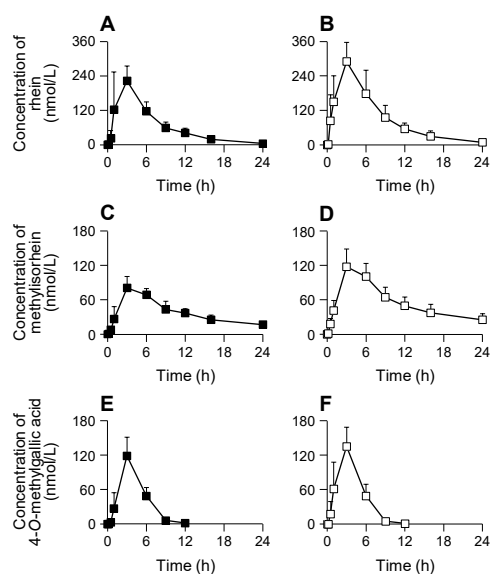

**Fig. 3** Plasma concentration-time profiles of Dahuang compounds in volunteers after dosing LianhuaQingwen at 12 capsules/person. (A and B), rhein; (C and D), methylisorhein; (E and F), 4-*O*-methylgallic acid. Solid dots, data of males; Open dots, data of females. Pharmacokinetic data of these compounds are shown [Table 2](#).

950  
951  
952  
953  
954  
955  
956  
957  
958  
959  
960  
961  
962  
963  
964  
965  
966

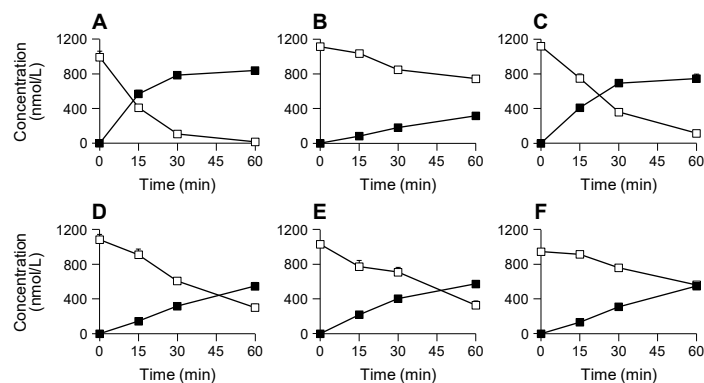

**Fig. 4** *In vitro* human LPH-mediated deglycosylation of Dahuang anthraquinone glycosides. Deglycosylation of the positive substrate phlorizin to phloretin (A) and Dahuang compounds emodin-8-*O*- $\beta$ -D-glucoside to emodin (B), chrysophanol-8-*O*- $\beta$ -D-glucoside to chrysophanol (C), physcion-8-*O*- $\beta$ -D-glucoside to physcion (D), chrysophanol-1-*O*- $\beta$ -D-glucoside to chrysophanol (E), and rhein-8-*O*- $\beta$ -D-glucoside to rhein (F). Solid dots, anthraquinone glycosides; open dots, the respective free anthraquinones. Other *in vitro* metabolism data of Dahuang compounds are shown in [Supplementary Fig. S1](#).

967  
968  
969  
970  
971  
972  
973  
974  
975  
976  
977  
978  
979  
980  
981  
982  
983  
984  
985

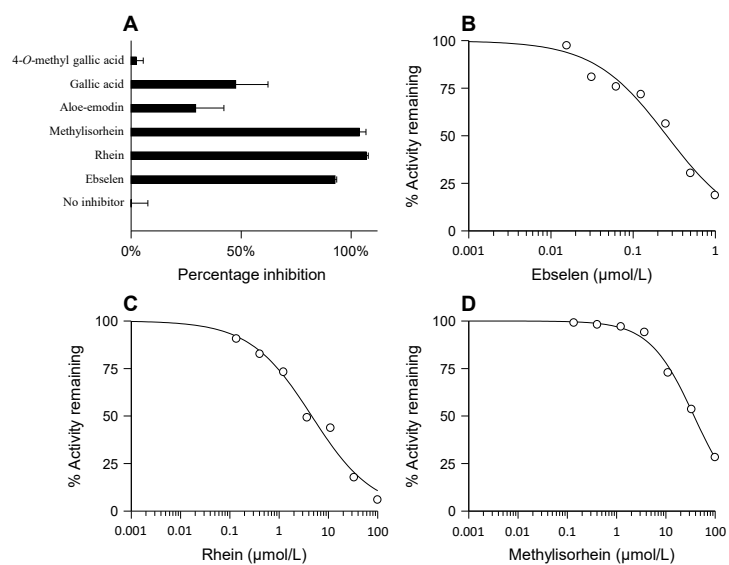

**Fig. 5** Inhibitory activities against of Dahuang compounds against SARS-CoV-2 3CL<sup>pro</sup>. (A) Percentage inhibition of 3CL<sup>pro</sup> by circulating Dahuang compounds at 100 μmol/L. (B) IC<sub>50</sub> of positive drug ebselen against 3CL<sup>pro</sup>. (C and D) IC<sub>50</sub> of rhein (**3**) and methylisorhein (**10**) against 3CL<sup>pro</sup>, respectively.

986  
987  
988  
989  
990  
991  
992  
993  
994  
995  
996  
997  
998  
999  
1000  
1001  
1002  
1003  
1004  
1005  
1006  
1007  
1008  
1009  
1010  
1011  
1012

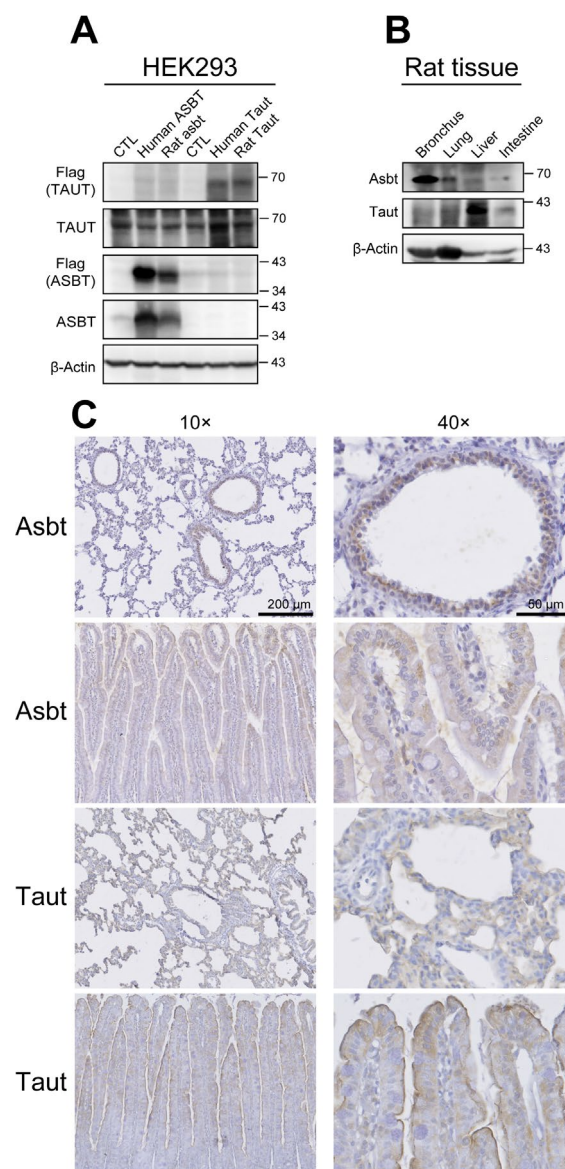

**Fig. 6** Expression and cellular localization of Taut and Asbt proteins in the rat intestine and lung. (A) Western blot analysis of human ASBT, rat Asbt, human TAUT, or rat Taut proteins in the transfected HEK-293 cells. Representative autoradiographs of the Western blots demonstrating 40-kDa human ASBT and rat Asbt protein bands in the homogenates of human ASBT- and rat Asbt-transfected HEK293 cells, respectively. Similarly, 65-kDa human TAUT and rat Taut proteins are observed in the homogenates of human TAUT- and rat Taut-transfected HEK293 cells, respectively. (B) Western blot analysis of Asbt and Taut proteins in rat lung, liver, and intestine tissues. In the homogenates of these tissues, 40-kDa Asbt protein bands and 65-kDa Taut protein bands are detected in rat bronchus, lung, liver, and intestine. (C) Immunohistochemical localization of Asbt and Taut proteins in rat intestine and lung tissues.
